# Supplementary material
Source: publisher figshare collection journal article supplement (https://geolsoc.figshare.com/ndownloader/files/26472550)
Supplement: Supplementary file 1 [file 26472550]

#NEXUS

begin data;
    dimensions ntax=111 nchar=276;
	Format datatype=standard gap=- missing=?;
    matrix

Nematoda	0	0	-	0	-	-	-	-	-	-	0	-	-	-	-	-	-	0	-	-	-	0	-	-	-	-	-	-	-	-	-	-	-	0	-	0	-	0	-	0	-	-	-	-	-	-	-	-	-	-	-	-	-	-	-	-	-	-	-	-	-	-	-	-	-	-	-	-	-	0	-	-	-	-	-	-	-	-	-	-	-	-	-	-	-	-	-	-	-	-	-	-	-	-	-	-	-	-	-	-	-	-	-	-	-	-	-	-	-	-	-	-	-	-	-	-	-	-	-	-	-	-	-	-	-	-	-	-	-	-	-	-	-	-	-	-	-	-	-	-	-	-	-	-	-	-	-	-	-	-	-	-	-	-	-	-	-	-	-	-	-	-	-	-	0	1	-	0	0	0	0	-	-	0	-	-	-	-	-	-	-	0	0	0	-	-	-	-	-	-	-	-	-	-	-	-	-	-	-	-	-	-	-	-	-	-	-	-	-	-	-	-	-	-	-	-	-	-	-	-	-	-	-	0	0	-	-	-	-	-	-	-	-	-	-	-	-	-	-	-	-	-	-	-	-	-	-	-	-	-	-	-	-	-	-	-	-	-	-	-	-	-	-	0	0	-	-	-	0	-	-	0	-	-	-	-
Priapulida	0	0	-	0	-	-	-	-	-	-	0	-	-	-	-	-	-	0	-	-	-	0	-	-	-	-	-	-	-	-	-	-	-	0	-	0	-	0	-	0	-	-	-	-	-	-	-	-	-	-	-	-	-	-	-	-	-	-	-	-	-	-	-	-	-	-	-	-	-	0	-	-	-	-	-	-	-	-	-	-	-	-	-	-	-	-	-	-	-	-	-	-	-	-	-	-	-	-	-	-	-	-	-	-	-	-	-	-	-	-	-	-	-	-	-	-	-	-	-	-	-	-	-	-	-	-	-	-	-	-	-	-	-	-	-	-	-	-	-	-	-	-	-	-	-	-	-	-	-	-	-	-	-	-	-	-	-	-	-	-	-	-	-	-	0	1	-	0	0	1	0	-	-	0	-	-	-	-	-	-	-	0	0	0	-	-	-	-	-	-	-	-	-	-	-	-	-	-	-	-	-	-	-	-	-	-	-	-	-	-	-	-	-	-	-	-	-	-	-	-	-	-	-	0	0	-	-	-	-	-	-	-	-	-	-	-	-	-	-	-	-	-	-	-	-	-	-	-	-	-	-	-	-	-	-	-	-	-	-	-	-	-	-	0	0	-	-	-	0	-	-	0	-	-	-	-
Collinsium	1	0	-	0	-	-	0	1	1	0	1	1	1	1	0	1	1	1	-	-	-	0	-	-	-	-	-	-	-	-	-	-	-	0	-	0	-	0	-	0	-	-	-	-	-	-	-	-	-	-	-	-	-	-	-	-	-	-	-	?	?	?	?	?	?	?	?	-	-	0	-	-	-	-	-	-	-	-	-	-	-	-	-	-	-	-	-	-	-	0	0	-	-	-	-	-	-	-	-	-	-	-	-	-	-	-	-	-	-	-	-	-	-	-	-	-	-	-	-	-	-	-	-	-	-	-	-	-	-	-	-	-	-	-	-	-	-	-	-	-	-	-	-	-	-	-	-	-	-	-	-	-	-	-	-	-	-	-	-	-	-	-	-	-	0	1	-	0	0	1	?	?	?	?	?	?	?	?	?	?	?	?	?	?	?	?	-	-	-	-	-	-	-	-	-	-	-	-	-	-	-	-	-	-	-	-	-	-	-	-	-	-	-	-	-	-	-	-	-	-	-	-	-	?	?	0	-	-	-	-	-	-	-	-	-	-	-	-	-	-	-	-	-	-	-	-	-	-	-	-	-	-	-	-	-	-	-	-	-	-	-	4	-	0	0	-	-	-	0	-	-	0	-	-	-	-
Luolishania	1	0	-	0	-	-	0	1	1	0	1	1	1	1	?	1	1	1	-	-	-	0	-	-	-	-	-	-	-	-	-	-	-	0	-	0	-	0	-	0	-	-	-	-	-	-	-	-	-	-	-	-	-	-	-	-	-	-	-	?	?	?	?	?	?	?	?	-	-	0	-	-	-	-	-	-	-	-	-	-	-	-	-	-	-	-	-	-	-	0	0	-	-	-	-	-	-	-	-	-	-	-	-	-	-	-	-	-	-	-	-	-	-	-	-	-	-	-	-	-	-	-	-	-	-	-	-	-	-	-	-	-	-	-	-	-	-	-	-	-	-	-	-	-	-	-	-	-	-	-	-	-	-	-	-	-	-	-	-	-	-	-	-	-	0	1	-	?	?	0	0	-	-	0	-	-	-	-	-	-	-	?	?	?	?	?	-	-	-	-	-	-	-	-	-	-	-	-	-	-	-	-	-	-	-	-	-	-	-	-	-	-	-	-	-	-	-	-	-	-	-	-	-	?	?	0	-	-	-	-	-	-	-	-	-	-	-	-	-	-	-	-	-	-	-	-	-	-	-	-	-	-	-	-	-	-	-	-	-	-	-	0	-	0	0	-	-	-	0	-	-	0	-	-	-	-
Hallucigenia	1	0	-	0	-	-	0	1	1	0	0	1	1	0	0	1	1	1	-	-	-	0	-	-	-	-	-	-	-	-	-	-	-	0	-	0	-	0	-	0	-	-	-	-	-	-	-	-	-	-	-	-	-	-	-	-	-	-	-	?	?	?	?	?	?	?	?	-	-	0	-	-	-	-	-	-	-	-	-	-	-	-	-	-	-	-	-	-	-	0	0	-	-	-	-	-	-	-	-	-	-	-	-	-	-	-	-	-	-	-	-	-	-	-	-	-	-	-	-	-	-	-	-	-	-	-	-	-	-	-	-	-	-	-	-	-	-	-	-	-	-	-	-	-	-	-	-	-	-	-	-	-	-	-	-	-	-	-	-	-	-	-	-	-	0	1	-	2	1	0	0	-	-	0	-	-	-	-	-	-	-	?	?	?	?	?	-	-	-	-	-	-	-	-	-	-	-	-	-	-	-	-	-	-	-	-	-	-	-	-	-	-	-	-	-	-	-	-	-	-	-	-	-	?	?	0	-	-	-	-	-	-	-	-	-	-	-	-	-	-	-	-	-	-	-	-	-	-	-	-	-	-	-	-	-	-	-	-	-	-	-	4	-	0	0	-	-	-	0	-	-	0	-	-	-	-
Aysheaia	1	0	-	0	-	-	1	1	0	0	1	0	-	-	1	0	1	1	-	-	-	0	-	-	-	-	-	-	-	-	-	-	-	0	-	0	-	0	-	0	-	-	-	-	-	-	-	-	-	-	-	-	-	-	-	-	-	-	-	?	?	?	?	?	?	?	?	-	-	0	-	-	-	-	-	-	-	-	-	-	-	-	-	-	-	-	-	-	0	0	0	-	1	0	0	0	-	-	-	-	-	-	-	-	-	-	-	-	-	-	-	-	-	0	-	-	-	-	-	-	-	-	-	-	-	-	-	-	-	-	-	-	-	-	-	-	-	-	-	-	-	-	-	-	-	-	-	-	-	-	-	-	-	-	-	-	-	-	-	-	-	-	-	-	0	1	-	1	0	?	0	-	-	0	-	-	-	-	-	-	-	?	?	?	?	?	-	-	-	-	-	-	-	-	-	-	-	-	-	-	-	-	-	-	-	-	-	-	-	-	-	-	-	-	-	-	-	-	-	-	-	-	-	?	?	0	-	-	-	-	-	-	-	-	-	-	-	-	-	-	-	-	-	-	-	-	-	-	-	-	-	-	-	-	-	-	-	-	-	-	-	0	-	0	0	-	-	-	0	-	-	0	-	-	-	-
Tardigrada	1	1	?	0	-	-	0	0	-	0	0	(01)	-	-	1	0	1	0	-	-	-	0	-	-	-	-	-	-	-	-	-	-	-	0	-	0	-	0	-	0	-	-	-	-	-	-	-	-	-	-	-	-	-	-	-	-	-	-	-	0	1	0	0	0	0	?	0	-	-	0	-	-	-	-	-	-	-	-	-	-	-	-	-	-	-	-	-	-	-	0	0	-	-	-	-	-	-	-	-	-	-	-	-	-	-	-	-	-	-	-	-	-	-	-	-	-	-	-	-	-	-	-	-	-	-	-	-	-	-	-	-	-	-	-	-	-	-	-	-	-	-	-	-	-	-	-	-	-	-	-	-	-	-	-	-	-	-	-	-	-	-	-	-	-	0	1	-	1	0	0	0	-	-	0	-	-	-	-	-	-	-	0	1	0	?	1	-	-	-	-	-	-	-	-	-	-	-	-	-	-	-	-	-	-	-	-	-	-	-	-	-	-	-	-	-	-	-	-	-	-	-	-	-	0	0	0	-	-	-	-	-	-	-	-	-	-	-	-	-	-	-	-	-	-	-	-	-	-	-	-	-	-	-	-	-	-	-	-	-	-	-	1	-	0	0	-	-	-	0	-	-	0	-	-	-	-
Onychophora	1	0	-	0	-	-	1	1	0	0	1	0	-	-	2	0	0	1	-	-	-	0	-	-	-	-	-	-	-	-	-	-	-	0	-	0	-	0	-	0	-	-	-	-	-	-	-	-	-	-	-	-	-	-	-	-	-	-	-	0	1	0	0	0	0	?	0	-	-	0	-	-	-	-	-	-	-	-	-	-	-	-	-	-	-	-	-	-	0	0	0	-	-	-	-	-	-	-	-	-	-	-	-	-	-	-	-	-	-	-	-	-	-	-	-	-	-	-	-	-	-	-	-	-	-	-	-	-	-	-	-	-	-	-	-	-	-	-	-	-	-	-	-	-	-	-	-	-	-	-	-	-	-	-	-	-	-	-	-	-	-	-	-	-	0	0	0	1	0	0	0	-	-	0	-	-	-	-	-	-	-	1	0	1	0	0	-	-	-	-	-	-	-	-	-	-	-	-	-	-	-	-	-	-	-	-	-	-	-	-	-	-	-	-	-	-	-	-	-	-	-	-	-	0	0	0	-	-	-	-	-	-	-	-	-	-	-	-	-	-	-	-	-	-	-	-	-	-	-	-	-	-	-	-	-	-	-	-	-	-	-	1	-	0	0	-	-	-	0	-	-	0	-	-	-	-
Jianshanopodia	1	0	-	0	-	-	1	1	0	0	1	1	0	-	?	0	0	?	-	-	-	0	-	-	-	-	-	-	-	-	-	-	-	0	-	0	-	0	-	0	-	-	-	-	-	-	-	-	-	-	-	-	-	-	-	-	-	-	-	?	?	?	?	?	?	?	?	-	-	0	-	-	-	-	-	-	-	-	-	-	-	-	-	-	-	-	-	-	0	0	0	-	1	0	0	0	-	-	-	-	-	-	-	-	-	-	-	-	-	-	-	-	-	0	-	-	-	-	-	-	-	-	-	-	-	-	-	-	-	-	-	-	-	-	-	-	-	-	-	-	-	-	-	-	-	-	-	-	-	-	-	-	-	-	-	-	-	-	-	-	-	-	-	-	0	1	-	?	?	0	?	?	?	1	1	1	0	0	0	0	-	?	?	?	?	?	-	-	-	-	-	-	-	-	-	-	-	-	-	-	-	-	-	-	-	-	-	-	-	-	-	-	-	-	-	-	-	-	-	-	-	-	-	?	?	0	-	-	-	-	-	-	-	-	-	-	-	-	-	-	-	-	-	-	-	-	-	-	-	-	-	-	-	-	-	-	-	-	-	-	-	?	-	0	0	-	-	-	0	-	-	0	-	-	-	-
Megadictyon	1	0	-	0	-	-	1	1	0	0	?	?	?	?	?	?	0	?	-	-	-	0	-	-	-	-	-	-	-	-	-	-	-	0	-	0	-	0	-	0	-	-	-	-	-	-	-	-	-	-	-	-	-	-	-	-	-	-	-	?	?	?	?	?	?	?	?	-	-	0	-	-	-	-	-	-	-	-	-	-	-	-	-	-	-	-	-	-	0	0	0	-	1	0	0	0	-	-	-	-	-	-	-	-	-	-	-	-	-	-	-	-	-	0	-	-	-	-	-	-	-	-	-	-	-	-	-	-	-	-	-	-	-	-	-	-	-	-	-	-	-	-	-	-	-	-	-	-	-	-	-	-	-	-	-	-	-	-	-	-	-	-	-	-	0	1	-	?	?	0	0	-	-	1	1	1	0	0	0	0	-	?	?	?	?	?	-	-	-	-	-	-	-	-	-	-	-	-	-	-	-	-	-	-	-	-	-	-	-	-	-	-	-	-	-	-	-	-	-	-	-	-	-	?	?	0	-	-	-	-	-	-	-	-	-	-	-	-	-	-	-	-	-	-	-	-	-	-	-	-	-	-	-	-	-	-	-	-	-	-	-	?	-	0	0	-	-	-	0	-	-	0	-	-	-	-
Kerygmachela	1	0	-	0	-	-	1	?	?	1	0	0	0	0	?	?	?	?	-	-	-	0	-	-	-	-	-	-	-	-	-	-	-	0	-	0	-	0	-	0	-	-	-	-	-	-	-	-	-	-	-	-	-	-	-	-	-	-	-	?	?	?	?	?	?	?	?	-	-	0	-	-	-	-	-	-	-	-	-	-	-	-	-	-	-	-	-	-	1	0	0	-	1	0	0	0	-	-	-	-	-	-	-	-	-	-	-	-	-	-	-	-	-	?	-	-	-	-	-	-	-	-	-	-	-	-	-	-	-	-	-	-	-	-	-	-	-	-	-	-	-	-	-	-	-	-	-	-	-	-	-	-	-	-	-	-	-	-	-	-	-	-	-	-	0	0	0	0	0	0	0	-	-	1	1	1	1	0	0	0	-	?	?	?	?	?	-	-	-	-	-	-	-	-	-	-	-	-	-	-	-	-	-	-	-	-	-	-	-	-	-	-	-	-	-	-	-	-	-	-	-	-	-	?	?	0	-	-	-	-	-	-	-	-	-	-	1	0	0	?	?	0	?	-	-	-	-	-	-	-	-	-	-	-	-	-	-	-	-	-	-	?	-	0	0	-	-	-	0	-	-	1	-	-	-	-
Pambdelurion	1	0	-	0	-	-	1	1	0	1	0	0	0	0	?	?	?	?	-	-	-	0	-	-	-	-	-	-	-	-	-	-	-	0	-	0	-	0	-	0	-	-	-	-	-	-	-	-	-	-	-	-	-	-	-	-	-	-	-	?	?	?	?	?	?	?	?	-	-	0	-	-	-	-	-	-	-	-	-	-	-	-	-	-	-	-	-	-	1	0	0	-	1	1	0	0	-	-	-	-	-	-	-	-	-	-	-	-	-	-	-	-	-	?	-	-	-	-	-	-	-	-	-	-	-	-	-	-	-	-	-	-	-	-	-	-	-	-	-	-	-	-	-	-	-	-	-	-	-	-	-	-	-	-	-	-	-	-	-	-	-	-	-	-	0	0	0	2	1	0	0	-	-	1	1	1	1	0	0	0	-	?	?	?	?	?	-	-	-	-	-	-	-	-	-	-	-	-	-	-	-	-	-	-	-	-	-	-	-	-	-	-	-	-	-	-	-	-	-	-	-	-	-	?	?	0	-	-	-	-	-	-	-	-	-	-	1	0	0	?	?	0	?	-	-	-	-	-	-	-	-	-	-	-	-	-	-	-	-	-	-	?	-	0	0	-	-	-	0	-	-	0	-	-	-	-
Opabinia	1	1	0	0	0	-	1	0	-	1	0	0	0	0	-	-	-	-	1	1	1	1	1	?	?	?	?	?	-	-	1	0	1	0	-	0	-	0	-	0	-	-	-	-	-	-	-	-	-	-	-	-	0	-	-	-	-	-	-	?	?	?	?	?	?	?	?	0	?	?	?	?	?	?	0	-	-	-	-	-	-	-	-	-	-	-	-	-	0	0	?	?	1	0	0	0	0	-	-	-	-	-	-	-	-	0	-	0	-	-	-	-	?	0	-	-	-	-	-	-	-	-	-	-	-	-	-	-	-	-	-	-	-	-	-	-	-	-	-	-	-	-	-	-	-	-	-	-	-	-	-	-	-	-	-	-	-	-	-	-	-	-	-	-	0	0	1	?	?	?	0	-	-	1	1	1	1	0	0	0	-	?	?	?	?	?	-	-	-	-	-	-	-	-	-	-	-	-	-	-	-	-	-	-	-	-	-	-	-	-	-	-	-	-	-	-	-	-	-	-	-	-	-	?	?	0	-	-	-	-	-	-	-	-	-	-	1	0	0	1	1	0	?	-	-	-	-	-	-	-	-	-	-	-	-	-	-	-	-	-	-	-	-	0	1	-	-	-	0	-	-	0	-	-	-	-
Anomalocaris	1	1	0	0	0	-	1	0	-	1	0	0	0	0	-	-	-	-	0	-	-	1	1	?	?	?	?	?	-	-	1	1	1	1	?	1	0	1	0	0	-	-	-	-	-	-	-	-	-	-	-	-	-	-	-	-	-	-	-	?	?	?	?	?	?	?	?	0	?	0	-	-	-	-	0	-	-	-	-	-	-	-	-	-	-	-	-	-	0	0	1	0	1	1	0	1	0	-	-	-	-	-	-	-	-	0	-	0	-	-	-	-	1	1	-	-	-	-	-	-	-	-	-	-	-	-	-	-	-	-	-	-	-	-	-	-	-	-	-	-	-	-	-	-	-	-	-	-	-	-	-	-	-	-	-	-	-	-	-	-	-	-	-	-	0	0	0	2	1	0	0	-	-	1	1	1	0	0	0	0	-	?	?	?	?	?	-	-	-	-	-	-	-	-	-	-	-	-	-	-	-	-	-	-	-	-	-	-	-	-	-	-	-	-	-	-	-	-	-	-	-	-	-	?	?	0	-	-	-	-	-	-	-	-	-	-	1	0	0	1	1	0	0	-	-	-	-	-	-	-	-	-	-	-	-	-	-	-	-	-	-	-	-	0	1	-	-	-	0	-	-	1	-	-	-	-
Amplectobelua	1	?	0	0	0	-	1	0	-	1	0	0	0	0	-	-	-	-	0	-	-	1	1	?	?	?	?	?	-	-	1	?	1	1	?	1	0	1	0	0	-	-	-	-	-	-	-	-	-	-	-	-	-	-	-	-	-	-	-	?	?	?	?	?	?	?	?	0	?	0	-	-	-	-	0	-	-	-	-	-	-	-	-	-	-	-	-	-	0	0	1	0	1	1	0	0	0	-	-	-	-	-	-	-	-	0	-	0	-	-	-	-	1	1	-	-	-	-	-	-	-	-	-	-	-	-	-	-	-	-	-	-	-	-	-	-	-	-	-	-	-	-	-	-	-	-	-	-	-	-	-	-	-	-	-	-	-	-	-	-	-	-	-	-	0	0	0	2	1	0	0	-	-	?	?	?	?	?	?	?	?	?	?	?	?	?	-	-	-	-	-	-	-	-	-	-	-	-	-	-	-	-	-	-	-	-	-	-	-	-	-	-	-	-	-	-	-	-	-	-	-	-	-	?	?	0	-	-	-	-	-	-	-	-	-	-	1	0	0	?	?	0	0	-	-	-	-	-	-	-	-	-	-	-	-	-	-	-	-	-	-	-	-	0	1	-	-	-	0	-	-	?	-	-	-	-
Hurdia	1	1	0	0	0	-	1	0	-	1	0	0	0	0	-	-	-	-	0	-	-	1	1	?	?	?	?	?	0	-	1	?	1	?	?	?	?	1	?	0	-	-	-	-	-	-	-	-	-	-	-	-	-	-	-	?	-	-	-	?	?	?	?	?	?	?	?	0	?	0	-	-	-	-	0	-	-	-	-	-	-	-	-	-	-	-	-	-	?	0	1	0	1	0	1	1	1	1	-	-	-	-	-	-	-	0	-	0	-	-	-	-	0	1	-	-	-	-	-	-	-	-	-	-	-	-	-	-	-	?	-	-	-	-	-	-	-	-	-	-	-	-	-	-	-	-	-	-	-	-	-	-	-	-	-	-	-	-	-	-	-	-	-	-	0	0	0	2	1	0	?	?	?	?	?	?	?	?	?	?	?	?	?	?	?	?	-	-	-	-	-	-	-	-	-	-	-	-	-	-	-	-	-	-	-	-	-	-	-	-	-	-	-	-	-	-	-	-	-	-	-	-	-	?	?	0	-	-	-	-	-	-	-	-	-	-	1	0	0	1	1	0	0	-	-	-	-	-	-	-	-	-	-	-	-	-	-	-	-	-	-	-	-	?	?	?	?	?	0	-	-	0	-	-	-	-
Aegirocassis	1	1	0	0	0	-	1	0	-	1	0	0	0	0	-	-	-	-	0	-	-	1	1	?	?	?	?	?	?	?	1	?	1	?	?	?	?	1	?	0	-	-	-	-	-	-	-	?	?	?	?	?	-	-	?	?	?	?	?	?	?	?	?	?	?	?	?	0	?	0	-	-	-	-	0	-	-	-	-	-	-	-	-	-	-	-	-	-	?	0	1	0	1	0	1	1	1	1	-	-	-	-	-	-	-	0	-	0	-	-	-	-	0	?	-	-	-	-	-	-	-	-	-	-	-	-	-	-	-	?	-	-	-	-	-	-	-	-	-	-	-	-	-	-	-	-	-	-	-	-	-	-	-	-	-	-	-	-	-	-	-	-	-	-	0	0	0	2	1	0	0	-	-	?	?	?	?	?	?	?	?	?	?	?	?	?	-	-	-	-	-	-	-	-	-	-	-	-	-	-	-	-	-	-	-	-	-	-	-	-	-	-	-	-	-	-	-	-	-	-	-	-	-	?	?	0	-	-	-	-	-	-	-	-	-	-	1	0	0	?	?	0	?	-	-	-	-	-	-	-	-	-	-	-	-	-	-	-	-	-	-	-	-	0	1	-	-	-	0	-	-	0	-	-	-	-
Schinderhannes	1	1	0	?	0	-	1	?	?	?	-	-	-	-	-	-	-	-	0	-	-	1	1	?	?	?	?	?	?	?	1	?	1	?	?	?	?	?	?	?	?	?	?	?	?	?	?	?	?	?	?	?	0	-	?	?	?	?	?	?	?	?	?	?	?	?	?	0	?	?	?	?	?	?	?	?	?	?	-	-	-	-	-	-	-	-	-	-	?	0	1	0	1	0	1	1	1	1	-	-	-	-	-	-	-	0	-	0	-	-	-	-	0	?	-	-	-	-	-	-	-	-	-	-	-	-	-	-	-	-	-	-	-	-	-	-	-	-	-	-	-	-	-	-	-	-	-	-	-	-	-	-	-	-	-	-	-	-	-	-	-	-	-	-	0	0	0	2	1	0	?	?	?	?	?	?	?	?	?	?	?	?	?	?	?	?	-	-	-	-	-	-	-	-	-	-	-	-	-	-	-	-	-	-	-	-	-	-	-	-	-	-	-	-	-	-	-	0	-	-	-	-	-	?	?	0	-	-	-	-	-	-	-	-	-	-	?	?	0	?	?	0	?	-	-	-	-	-	-	-	-	-	-	-	-	-	-	-	-	-	-	-	-	1	-	1	0	0	?	0	-	0	0	-	-	-
Surusicaris	1	1	?	0	0	-	1	1	0	0	-	-	-	-	-	-	-	-	0	-	-	1	1	?	?	?	?	?	0	-	1	?	1	1	1	0	-	0	-	1	0	0	1	0	0	1	0	-	-	-	-	-	0	-	0	0	-	-	-	?	?	?	?	?	?	?	?	?	?	0	-	-	-	-	0	-	-	-	-	-	-	-	-	-	-	-	-	-	0	1	1	1	1	0	1	0	1	1	0	-	-	-	-	-	-	0	0	0	-	-	-	-	-	1	-	-	-	-	-	-	-	-	-	-	-	-	-	-	-	1	-	-	-	-	-	-	-	-	-	-	-	-	-	0	-	-	-	-	-	-	-	-	-	-	-	-	-	-	-	-	-	-	-	-	0	0	0	?	?	0	0	-	-	?	?	?	?	?	?	?	?	?	?	?	?	?	-	-	-	-	-	-	-	0	-	-	-	0	-	0	-	0	1	0	0	0	0	0	-	0	?	-	-	-	-	-	?	?	0	?	0	-	-	?	?	1	0	-	-	-	-	-	-	-	-	-	1	?	0	0	-	-	0	?	?	0	0	0	?	1	?	?	0	0	0	0	0	0	0	-	-	4	-	0	1	-	-	-	0	-	-	0	-	-	-	-
Isoxys_acutangulus	1	1	?	0	0	-	?	0	-	0	-	-	-	-	-	-	-	-	0	-	-	1	1	?	?	?	?	?	0	-	1	?	1	?	?	0	-	0	-	1	0	0	1	0	0	1	0	-	-	-	-	-	0	-	0	0	-	-	-	?	?	?	?	?	?	?	?	?	?	?	?	?	?	?	0	-	-	-	-	-	-	-	-	-	-	-	-	-	0	1	1	1	1	0	0	0	0	-	0	-	-	-	-	-	-	0	0	0	-	-	-	-	-	0	?	?	?	?	?	?	?	-	-	-	2	?	-	0	0	1	0	0	?	?	?	-	?	?	?	?	?	0	0	0	0	0	-	-	-	-	-	-	-	-	-	-	-	0	0	-	-	-	0	0	0	0	0	?	?	0	0	-	-	1	1	1	1	0	0	0	-	?	?	?	?	?	-	-	-	-	-	-	-	0	-	-	-	0	-	0	-	0	1	0	0	0	0	0	-	0	?	-	-	-	-	-	?	1	0	0	0	-	-	?	?	?	?	?	?	?	?	?	?	?	?	?	1	1	0	1	1	0	0	2	?	0	0	0	1	0	?	?	0	0	0	0	0	0	0	-	-	6	-	0	1	-	-	-	0	-	-	0	-	-	-	-
Isoxys_auritus	1	1	?	0	0	-	?	0	-	0	-	-	-	-	-	-	-	-	0	-	-	1	1	?	?	?	?	?	0	-	1	?	1	?	?	0	-	0	-	1	0	0	1	0	0	1	0	-	-	-	-	-	0	-	0	0	-	-	-	?	?	?	?	?	?	?	?	?	?	?	?	?	?	?	0	-	-	-	-	-	-	-	-	-	-	-	-	-	0	1	1	0	1	0	0	0	0	-	0	-	-	-	-	-	-	0	0	0	-	-	-	-	1	0	?	?	?	?	?	?	?	-	-	-	2	?	-	0	0	1	0	0	?	?	?	-	?	?	?	?	?	0	0	0	0	0	-	-	-	-	-	-	-	-	-	-	-	0	0	-	-	-	0	0	0	0	0	?	?	0	0	-	-	1	1	1	1	0	0	0	-	?	?	?	?	?	-	-	-	-	-	-	-	0	-	-	-	0	-	0	-	0	1	0	0	0	0	0	-	0	?	-	-	-	-	-	?	1	0	0	0	-	-	?	?	?	?	?	?	?	?	?	?	?	?	?	1	1	0	1	1	0	0	2	?	0	0	0	1	0	?	?	0	0	0	0	0	0	0	-	-	6	-	0	1	-	-	-	0	-	-	0	-	-	-	-
TAXON NOT SHOWN IN GRAPHICAL RESULT	[	Kylinxia	1	1	1	0	0	-	1	0	-	0	-	-	-	-	-	-	-	-	1	1	1	1	1	?	?	?	?	?	0	-	1	0	1	1	1	?	?	0	?	1	1	-	-	-	-	-	-	0	0	0	0	0	0	-	0	0	0	0	0	?	?	?	?	?	?	?	?	?	?	?	?	?	?	?	?	?	?	?	0	?	?	?	?	-	-	-	-	-	0	1	1	0	1	0	0	1	0	-	0	-	-	-	-	-	-	0	0	0	-	-	-	-	1	?	?	?	?	?	?	?	0	-	-	-	2	?	-	0	1	1	0	?	1	?	?	-	1	?	0	?	2	0	?	0	0	0	-	-	-	-	-	-	-	?	-	?	?	0	0	-	-	-	0	0	0	0	?	?	?	0	0	-	-	0	-	-	-	-	-	-	-	?	?	?	?	?	-	-	-	-	-	-	-	1	1	1	1	0	-	0	-	1	-	0	0	0	0	0	-	1	0	1	0	0	-	-	?	1	0	?	0	-	-	?	?	1	?	?	?	?	?	?	?	?	0	-	1	1	?	?	?	0	0	2	?	0	1	0	1	0	0	?	?	0	?	?	?	?	0	-	-	6	?	1	-	1	2	0	?	1	3	0	0	0	0	0	]
Fortiforceps	1	1	1	0	0	-	1	0	-	0	-	-	-	-	-	-	-	-	0	-	-	1	1	?	?	?	?	?	0	-	1	1	1	1	0	1	0	0	?	1	1	-	-	-	-	-	-	0	0	1	0	?	0	-	0	0	0	0	0	?	?	?	?	?	?	?	?	?	?	1	0	?	-	-	0	-	-	-	0	?	?	?	?	-	-	-	-	-	1	1	1	1	1	0	0	0	1	1	1	1	0	0	1	0	0	0	1	0	-	-	-	-	-	0	?	?	0	1	?	-	-	-	-	-	2	?	-	0	1	1	0	1	1	1	0	-	1	?	0	?	2	0	?	0	0	0	-	-	-	-	-	-	-	?	-	-	-	0	0	-	-	-	0	0	?	0	?	3	-	0	0	-	-	1	1	?	?	0	?	0	?	?	?	?	?	?	-	-	-	-	-	-	-	0	-	-	-	0	-	0	-	1	-	0	0	0	0	0	-	0	0	-	-	-	-	-	?	1	1	0	0	-	-	?	?	1	?	?	?	?	?	?	?	?	?	?	1	1	1	?	?	0	0	2	?	0	1	0	1	0	0	?	0	0	0	1	0	0	0	-	-	?	?	1	-	1	2	0	?	0	-	0	0	0	-	-
Jianfengia	1	1	1	0	0	-	1	0	-	0	-	-	-	-	-	-	-	-	0	-	-	1	1	?	?	?	?	?	0	-	1	1	1	1	2	?	?	0	?	1	1	-	-	-	-	-	-	0	0	1	0	0	0	-	?	0	0	0	0	?	?	?	?	?	?	?	?	?	?	1	0	?	-	-	0	-	-	-	0	?	?	?	?	-	-	-	-	-	0	1	1	1	1	0	0	0	1	1	1	0	0	0	0	1	1	0	1	0	-	-	-	-	-	0	?	?	?	?	?	0	0	-	-	-	2	?	-	0	1	1	0	1	1	?	0	-	1	?	0	?	2	0	?	0	0	0	-	-	-	-	-	-	-	?	-	-	-	0	0	-	-	-	0	0	?	0	?	3	-	0	0	-	-	?	?	?	?	?	?	?	?	?	?	?	?	?	-	-	-	-	-	-	-	0	-	-	-	0	-	0	-	1	-	0	0	0	0	0	-	1	0	1	0	?	?	-	?	1	1	0	0	-	-	?	?	1	?	?	?	?	?	?	?	?	?	?	1	1	1	?	?	0	0	2	?	0	1	0	1	0	0	?	0	0	0	?	0	0	0	-	-	?	?	1	-	1	?	0	?	0	-	0	0	0	-	-
Sklerolibyon	1	1	1	0	0	-	1	0	-	0	-	-	-	-	-	-	-	-	0	-	-	1	1	?	?	?	?	?	0	-	1	?	1	1	2	?	?	0	?	1	1	-	-	-	-	-	-	0	?	1	0	0	0	-	?	0	1	0	0	?	?	?	?	?	?	?	?	?	?	?	?	?	?	?	?	?	?	?	0	?	?	?	?	-	-	-	-	-	0	1	1	1	1	0	0	0	1	1	1	0	0	0	0	1	0	0	1	0	-	-	-	-	-	0	?	?	0	1	?	0	0	-	-	-	2	?	-	0	1	1	0	1	1	1	0	-	1	?	0	?	2	0	?	0	0	0	-	-	-	-	-	-	-	?	-	-	-	0	0	-	-	-	0	0	?	0	?	3	-	0	0	-	-	?	?	?	?	?	?	?	?	?	?	?	?	?	-	-	-	-	-	-	-	0	-	-	-	0	-	0	-	1	-	0	0	0	0	0	-	1	0	1	0	?	?	-	?	1	1	0	0	-	-	?	?	1	?	?	?	?	?	?	?	?	?	?	1	1	1	?	?	0	0	2	?	0	1	0	1	0	0	?	0	0	0	?	?	?	0	-	-	?	?	1	-	?	?	?	?	?	?	?	?	?	-	-
Parapeytoia	1	1	1	0	?	-	1	0	-	0	-	-	-	-	-	-	-	-	?	?	?	?	?	?	?	?	?	?	?	?	?	?	?	?	?	?	?	0	?	?	?	?	?	?	?	?	?	?	?	?	?	?	0	-	?	0	?	?	?	?	?	?	?	?	?	?	?	1	?	?	?	?	?	?	?	?	?	?	0	?	1	0	0	-	-	-	-	-	0	1	1	1	1	0	0	0	1	1	1	1	0	0	1	?	0	0	1	0	-	-	-	-	-	0	?	?	?	?	?	?	?	-	-	-	?	?	?	0	?	1	0	?	?	?	0	-	1	?	0	?	?	0	?	0	1	0	-	-	-	-	-	-	-	?	-	?	?	0	0	-	?	-	0	0	?	0	?	3	-	0	?	?	?	?	?	?	?	?	?	?	?	?	?	?	?	?	-	-	-	-	-	-	-	?	?	?	?	0	-	?	?	?	?	?	?	0	?	?	?	?	?	?	?	?	?	-	?	1	?	0	0	-	-	?	?	1	0	-	-	-	-	-	-	-	1	?	1	1	?	?	?	0	?	?	?	0	1	0	?	0	0	?	0	0	?	?	?	?	0	-	-	?	?	1	-	?	?	?	?	?	?	?	?	?	-	-
Yohoia	1	1	1	0	0	-	1	0	-	0	-	-	-	-	-	-	-	-	0	-	-	1	1	?	?	?	?	?	0	-	0	-	-	1	1	0	-	0	-	1	1	-	-	-	-	-	-	1	0	0	0	0	0	-	0	0	0	0	0	?	?	?	?	?	?	?	?	1	?	?	?	?	?	?	?	?	?	?	0	?	?	?	0	-	-	-	-	-	0	1	1	1	1	0	0	0	1	1	1	0	0	0	0	0	1	0	1	0	-	-	-	-	-	0	0	0	?	?	?	?	0	-	-	-	2	0	-	0	1	1	0	?	1	?	0	-	1	?	0	?	?	0	0	0	0	0	-	-	-	-	-	-	-	?	-	?	?	0	0	-	-	-	0	0	?	0	?	3	-	0	0	-	-	0	-	-	-	-	-	-	-	?	?	?	?	?	-	-	-	-	-	-	-	0	-	-	-	0	-	1	0	0	1	0	0	0	0	0	-	1	0	1	0	1	0	-	?	1	?	0	0	-	-	?	?	1	?	0	0	?	0	?	?	?	0	-	1	1	1	?	?	0	0	2	1	0	1	0	-	0	0	?	0	0	0	1	0	0	0	-	-	?	?	1	-	1	1	0	0	0	-	0	0	0	-	-
Haikoucaris	1	1	1	0	0	-	1	0	-	0	-	-	-	-	-	-	-	-	?	?	?	1	1	?	?	?	?	?	0	-	0	-	-	1	1	?	?	0	?	1	1	-	-	-	-	-	-	1	0	0	0	0	0	-	?	0	0	0	0	?	?	?	?	?	?	?	?	?	?	?	?	?	?	?	?	?	?	?	0	?	?	?	?	-	-	-	-	-	0	1	1	1	1	0	0	0	1	1	1	1	1	1	-	-	-	0	1	0	-	-	-	-	-	0	?	?	?	?	?	?	0	-	-	-	2	0	-	0	1	?	0	?	?	?	0	-	?	?	0	?	?	0	?	?	?	0	-	-	-	-	-	-	-	?	-	?	?	0	0	-	-	-	0	0	?	0	?	3	-	0	0	-	-	?	?	?	?	?	?	?	?	?	?	?	?	?	-	-	-	-	-	-	-	0	-	-	-	0	-	0	-	0	1	0	0	0	0	0	-	1	0	1	0	?	?	-	?	1	?	0	0	-	-	?	?	1	?	?	?	?	?	?	?	?	?	?	1	1	1	?	?	0	0	2	1	0	1	0	?	0	0	?	0	0	?	?	?	?	0	-	-	?	?	1	-	?	?	0	?	1	3	0	0	0	-	-
Leanchoiliidae	1	1	1	0	0	-	1	0	-	0	-	-	-	-	-	-	-	-	1	0	-	1	1	?	?	?	?	?	0	-	0	-	-	1	1	0	-	0	-	1	1	-	-	-	-	-	-	1	0	0	0	(01)	0	-	0	0	0	0	0	?	1	?	?	?	?	?	?	1	?	1	?	?	?	?	0	-	-	-	0	?	?	?	0	-	-	-	-	-	0	(01)	1	1	1	0	0	0	1	1	1	0	1	1	-	-	-	1	0	0	-	-	-	-	-	0	0	0	0	1	0	0	0	-	-	-	2	0	-	0	1	1	0	1	1	1	0	-	1	?	0	?	2	0	0	0	0	0	-	-	-	-	-	-	-	?	-	-	-	0	0	-	-	-	0	0	?	0	1	3	-	0	0	-	-	1	1	1	1	0	0	0	-	?	?	?	?	?	-	-	-	-	-	-	-	0	-	-	-	0	-	0	-	0	1	0	0	0	0	0	-	1	0	(01)	1	1	1	-	?	1	1	0	0	-	-	?	?	1	?	0	0	?	0	?	?	?	0	-	1	1	1	1	1	0	0	2	1	0	1	0	1	0	0	?	0	0	0	1	0	0	0	-	-	6	0	1	-	1	1	0	0	0	-	0	0	0	-	-
Kiisortoqia	1	1	1	0	?	-	0	0	-	0	-	-	-	-	-	-	-	-	?	?	?	?	?	?	?	?	?	?	?	?	?	?	?	1	1	0	-	0	-	1	1	-	-	-	-	-	-	1	0	0	0	0	0	-	?	0	0	0	0	?	?	?	?	?	?	?	?	1	?	?	?	?	?	?	?	?	?	?	0	0	?	?	?	-	-	-	-	-	0	0	1	0	1	0	0	0	0	-	-	-	-	-	-	-	-	-	-	0	-	-	-	-	1	0	?	?	1	-	-	-	0	-	-	-	2	?	-	0	1	1	0	?	1	0	0	-	1	?	0	?	2	0	?	?	?	0	-	-	-	-	-	-	-	?	-	-	-	0	0	-	-	-	0	0	0	0	1	3	-	0	?	?	?	1	1	1	1	0	?	?	?	?	?	?	?	?	-	-	-	-	-	-	-	1	0	?	1	0	-	0	-	0	0	0	0	0	0	0	-	1	0	0	1	1	0	-	?	1	?	0	0	-	-	?	?	1	?	0	0	?	?	?	?	?	?	?	1	1	?	1	1	0	0	2	1	0	1	0	1	0	0	?	?	0	0	?	?	?	0	-	-	?	?	1	-	0	-	-	0	0	-	0	0	0	0	0
Kuamaia	1	1	1	0	0	-	0	0	-	0	-	-	-	-	-	-	-	-	0	-	-	1	1	?	?	?	?	?	2	-	-	-	-	1	1	1	0	0	0	1	1	-	-	-	-	-	-	1	0	0	?	0	0	-	?	0	0	0	0	?	?	?	?	?	?	?	?	1	?	1	0	1	-	-	1	1	1	-	0	0	?	?	?	-	-	-	-	-	0	0	1	0	0	-	-	-	0	-	-	-	-	-	-	-	-	-	-	0	-	-	-	-	1	0	0	0	?	?	0	0	0	-	-	-	2	4	-	0	1	1	0	1	1	0	0	-	1	1	0	?	2	0	1	0	?	0	-	-	-	-	-	-	-	?	-	-	-	0	0	-	-	-	0	0	0	0	1	3	-	0	?	?	?	?	?	?	?	?	?	?	?	?	?	?	?	?	-	-	-	-	-	-	-	1	(01)	(01)	1	0	-	0	-	0	?	0	0	0	0	0	-	1	0	0	1	0	-	-	?	1	1	0	0	-	-	?	?	1	?	?	?	?	?	?	?	?	1	0	1	1	0	1	1	0	0	2	2	?	1	0	1	?	0	?	0	0	1	?	?	?	0	-	-	0	0	1	-	0	-	-	0	0	-	0	0	0	0	1
Kwanyinaspis	1	1	1	0	0	-	0	0	-	0	-	-	-	-	-	-	-	-	0	-	-	1	1	?	?	?	?	?	2	-	-	-	-	1	1	?	?	0	?	1	1	-	-	-	-	-	-	1	0	0	0	0	0	-	?	0	0	0	0	?	?	?	?	?	?	?	?	1	?	?	?	?	?	?	1	1	1	?	0	0	?	?	?	-	-	-	-	-	0	0	1	0	0	-	-	-	0	-	-	-	-	-	-	-	-	-	-	0	-	-	-	-	1	0	0	0	1	-	-	-	0	-	-	-	2	4	-	0	1	1	0	?	1	0	0	-	1	?	0	?	2	0	?	0	?	0	-	-	-	-	-	-	-	?	-	-	-	0	0	-	-	-	0	0	0	0	1	3	-	0	?	?	?	?	?	?	?	?	?	?	?	?	?	?	?	?	-	-	-	-	-	-	-	1	0	1	1	0	-	0	-	0	1	0	0	0	0	0	-	1	0	0	1	0	-	-	?	1	?	0	0	-	-	?	?	1	?	0	0	?	0	?	?	?	1	0	1	1	0	1	1	0	0	2	2	0	1	0	1	0	0	?	0	0	0	?	?	?	0	-	-	?	?	1	-	0	-	-	0	0	-	0	0	0	-	-
Burgessia	1	1	1	0	?	-	0	0	-	0	-	-	-	-	-	-	-	-	0	-	-	?	?	?	?	?	?	?	0	-	?	?	?	1	1	?	?	0	?	1	0	1	-	-	-	-	-	-	-	-	-	-	0	-	0	0	-	-	-	?	?	?	?	?	?	?	?	1	?	?	?	?	?	?	?	?	?	?	0	?	?	?	0	-	-	-	-	-	0	0	1	0	0	-	-	-	0	-	-	-	-	-	-	-	-	-	-	0	-	-	-	-	1	0	?	?	1	-	-	-	?	-	-	-	?	?	?	?	1	1	1	?	1	0	0	-	1	0	0	0	?	0	?	0	?	0	-	-	-	-	-	-	-	?	-	-	-	0	0	-	-	-	0	0	?	0	?	3	-	0	0	-	-	1	0	-	-	-	1	1	1	?	?	?	?	?	-	-	-	-	-	-	-	1	0	1	0	0	-	0	-	0	3	0	-	0	0	0	-	0	?	-	-	-	-	-	?	1	1	0	0	-	-	?	?	1	?	?	?	?	?	?	?	?	?	?	1	1	?	?	?	?	0	?	?	0	1	0	1	0	-	?	0	0	1	0	1	0	?	-	-	?	?	1	-	0	-	-	?	0	-	0	0	0	-	-
Emeraldella	1	1	1	0	?	-	0	0	-	0	-	-	-	-	-	-	-	-	0	-	-	?	?	?	?	?	?	?	0	-	?	?	?	1	2	0	-	0	-	1	1	-	-	-	-	-	-	1	0	0	?	0	0	-	1	0	0	0	0	?	?	?	?	?	?	?	?	1	?	1	0	0	-	-	1	0	1	-	0	0	1	?	0	-	-	-	-	-	0	0	1	0	0	-	-	-	0	-	-	-	-	-	-	-	-	-	-	0	-	-	-	-	1	0	0	0	?	?	0	0	?	0	0	-	2	4	-	0	1	1	?	1	1	0	0	-	?	?	0	0	?	0	1	0	?	0	-	-	-	-	-	-	-	?	-	-	-	0	0	-	0	-	0	0	?	0	1	3	-	0	?	?	?	1	1	2	0	?	0	0	-	?	?	?	?	?	-	-	-	-	-	-	-	0	-	-	-	0	-	0	-	0	1	0	0	0	0	0	-	1	0	0	1	1	0	-	?	1	1	0	0	-	-	?	?	1	?	0	0	?	0	?	?	?	1	0	1	1	0	1	1	0	0	2	2	0	1	0	1	0	0	?	0	0	1	1	1	0	0	-	-	2	0	1	-	1	0	1	1	1	3	0	0	0	-	-
Sidneyia	1	1	1	0	0	-	0	0	-	0	-	-	-	-	-	-	-	-	0	-	-	1	1	?	?	?	?	?	0	-	0	0	0	1	?	0	-	0	-	1	1	-	-	-	-	-	-	1	0	0	0	0	0	-	1	0	0	1	0	?	?	?	?	?	?	?	?	1	?	1	0	0	-	-	1	0	1	-	0	0	?	?	0	-	-	-	-	-	0	0	1	0	0	-	-	-	0	-	-	-	-	-	-	-	-	-	-	0	-	-	-	-	1	0	0	0	?	?	0	0	?	?	?	-	2	4	-	0	1	1	?	1	1	0	0	-	?	?	0	0	?	0	1	0	1	0	-	-	-	-	-	-	-	?	-	-	-	0	0	-	?	-	0	0	?	0	1	3	-	0	?	?	?	1	1	?	?	?	0	0	-	?	?	?	?	?	-	-	-	-	-	-	-	0	-	-	-	0	-	1	0	0	1	0	0	0	0	0	-	1	0	0	1	1	1	-	?	1	1	0	0	-	-	?	?	1	1	0	0	1	0	?	?	?	1	0	1	1	0	1	1	0	0	2	2	0	1	0	-	0	0	?	1	0	1	1	1	0	0	-	-	2	0	1	-	1	1	0	1	1	3	0	0	0	-	-
Aglaspidida	1	1	1	1	0	-	0	0	-	0	-	-	-	-	-	-	-	-	0	-	-	1	1	?	?	?	?	?	1	0	-	-	-	1	?	0	-	0	-	1	1	-	-	-	-	-	-	1	0	0	1	0	0	-	1	0	0	0	0	?	?	?	?	?	?	?	?	1	?	1	?	?	?	?	1	?	?	?	0	0	?	?	?	-	-	-	-	-	0	0	1	0	0	-	-	-	0	-	-	-	-	-	-	-	-	-	-	0	-	-	-	-	1	0	0	0	?	?	?	?	0	0	1	-	-	-	-	-	1	1	0	1	1	0	?	?	0	?	0	?	-	0	0	?	?	0	-	-	-	-	-	-	-	?	-	?	?	0	?	-	?	-	0	0	0	0	1	3	-	0	?	?	?	?	?	?	?	?	?	?	?	?	?	?	?	?	-	-	-	-	-	-	-	0	-	-	-	0	-	0	-	0	1	0	0	0	0	0	-	1	0	0	1	1	0	-	?	1	1	0	0	-	-	?	?	1	?	?	?	?	?	?	?	?	1	0	0	-	-	?	?	?	0	-	-	0	1	0	1	0	0	?	?	0	0	?	?	?	0	-	-	?	0	1	-	1	0	0	0	1	0	0	0	0	-	-
Olenoides	1	1	1	1	1	-	0	0	-	0	-	-	-	-	-	-	-	-	0	-	-	1	1	?	?	?	0	?	1	1	-	-	-	1	1	0	-	0	-	1	1	-	-	-	-	-	-	1	0	1	1	0	0	-	1	0	1	0	1	?	?	?	?	?	?	?	?	1	?	1	0	0	-	-	1	0	1	-	0	0	1	?	0	-	-	-	-	-	0	0	1	0	0	-	-	-	0	-	-	-	-	-	-	-	-	-	-	0	-	-	-	-	1	0	0	0	1	-	-	-	0	-	0	-	2	2	-	0	1	1	0	1	1	0	0	-	1	1	0	0	2	0	1	0	1	0	-	-	-	-	-	-	-	?	-	-	-	0	0	-	-	-	0	0	0	0	1	3	-	0	1	1	0	1	1	2	0	?	0	0	-	?	?	?	?	?	-	-	-	-	-	-	-	1	0	0	1	0	-	0	-	0	1	0	0	0	0	0	-	1	0	0	1	1	1	-	?	1	1	0	0	-	-	?	?	1	0	-	-	-	-	-	-	-	1	0	1	1	0	1	1	0	0	2	1	0	1	0	1	0	0	?	0	0	1	1	1	0	0	-	-	2	0	1	-	0	-	-	0	1	1	0	0	0	1	1
Hongshiyanaspis	1	1	1	1	1	-	0	0	-	0	-	-	-	-	-	-	-	-	0	-	-	1	1	?	?	?	0	?	1	1	-	-	-	1	1	0	-	0	-	1	1	-	-	-	-	-	-	1	0	1	1	0	0	-	1	0	1	0	1	?	?	?	?	?	?	?	?	1	?	1	0	0	-	-	1	1	1	-	0	0	?	?	0	-	-	-	-	-	0	0	1	0	0	-	-	-	0	-	-	-	-	-	-	-	-	-	-	0	-	-	-	-	1	0	0	0	1	-	-	-	0	-	0	-	2	4	-	0	1	1	0	1	1	0	0	-	1	?	0	?	2	0	1	?	1	0	-	-	-	-	-	-	-	?	-	-	-	0	0	-	-	-	0	0	0	0	1	3	-	0	?	?	?	?	?	?	?	?	?	?	?	?	?	?	?	?	-	-	-	-	-	-	-	1	0	0	1	0	-	0	-	0	0	0	0	0	0	0	-	1	0	0	1	1	1	-	?	1	1	0	0	-	-	?	?	1	0	-	-	-	-	-	-	-	1	0	1	1	0	1	1	0	0	2	2	0	1	0	1	0	0	?	0	0	1	0	1	0	0	-	-	2	0	1	-	0	-	-	0	0	-	0	0	0	1	0
Naraoia	1	1	1	0	0	-	0	0	-	0	-	-	-	-	-	-	-	-	0	-	-	1	1	?	?	?	-	-	0	-	?	-	?	1	1	0	-	0	-	1	1	-	-	-	-	-	-	1	0	0	0	0	0	-	1	0	(01)	1	0	?	?	?	?	?	?	?	?	1	?	1	0	1	-	-	1	1	1	-	0	0	1	?	0	-	-	-	-	-	0	0	1	0	0	-	-	-	0	-	-	-	-	-	-	-	-	-	-	0	-	-	-	-	1	0	0	0	1	-	-	-	0	-	0	-	2	2	-	0	1	1	0	1	1	0	0	-	1	1	0	0	2	0	1	0	1	0	-	-	-	-	-	-	-	?	-	-	-	0	0	-	-	-	0	0	0	0	1	3	-	0	0	-	-	1	1	2	0	1	1	0	1	?	?	?	?	?	-	-	-	-	-	-	-	1	1	1	1	0	-	0	-	1	-	0	0	0	0	0	-	1	0	0	1	-	-	-	?	1	1	0	0	-	-	?	?	1	0	-	-	-	-	-	-	-	1	0	1	1	0	1	1	0	0	2	1	0	1	0	1	0	0	?	0	0	1	0	1	0	0	-	-	?	?	1	-	0	-	-	0	0	-	0	0	0	0	0
Xandarella	1	1	1	0	0	-	0	0	-	0	-	-	-	-	-	-	-	-	0	-	-	1	1	?	?	?	?	?	1	0	-	-	-	1	3	0	-	0	-	1	1	-	-	-	-	-	-	1	0	?	0	0	0	-	1	0	1	1	1	?	?	?	?	?	?	?	?	1	?	1	0	0	-	-	1	1	1	-	0	0	1	?	0	-	-	-	-	-	0	0	1	0	0	-	-	-	0	-	-	-	-	-	-	-	-	-	-	0	-	-	-	-	1	0	0	0	1	-	-	-	0	-	0	0	2	2	-	0	1	1	0	1	1	0	0	-	1	?	?	0	2	0	?	0	?	0	-	-	-	-	-	-	-	?	-	-	-	0	0	-	0	-	0	0	0	0	1	3	-	0	?	?	?	1	1	2	0	1	0	0	-	?	?	?	?	?	-	-	-	-	-	-	-	0	-	-	-	0	-	0	-	0	1	0	0	0	0	1	1	1	0	0	1	1	0	-	?	1	1	?	0	-	-	?	?	1	?	?	?	?	0	?	?	?	?	?	1	1	0	1	1	0	0	2	1	0	1	0	1	0	0	?	0	0	?	?	?	?	0	-	-	?	?	1	-	1	0	0	1	0	-	0	0	0	-	-
Agnostus	1	1	1	1	0	-	0	0	-	0	-	-	-	-	-	-	-	-	0	-	-	1	1	?	?	?	?	?	0	-	0	-	-	1	3	0	-	0	-	1	1	-	-	-	-	-	-	1	1	1	1	0	0	-	1	0	1	0	0	?	?	?	?	?	?	?	?	1	?	?	?	?	?	?	1	1	1	?	0	0	1	?	0	-	-	-	-	-	0	0	1	0	0	-	-	-	0	-	-	-	-	-	-	-	-	-	-	0	-	-	-	-	1	0	1	?	?	1	1	1	0	-	?	?	2	?	-	?	0	1	0	?	1	0	0	-	0	0	0	0	-	0	?	0	1	0	-	-	-	-	-	-	-	?	-	-	-	0	0	-	0	-	0	0	0	0	1	3	-	0	0	-	-	1	1	2	0	0	1	0	1	?	?	?	?	?	-	-	-	-	-	-	-	1	0	1	1	0	-	0	-	0	4	0	0	0	0	0	-	1	0	0	0	1	1	-	?	1	?	?	0	-	-	?	?	1	0	0	0	?	?	?	?	?	1	?	1	1	?	?	?	?	?	?	?	0	1	0	1	0	?	?	?	0	?	?	?	?	0	-	-	2	?	1	-	0	-	-	0	0	-	0	0	0	1	1
Pycnogonida	1	1	1	0	-	-	0	0	-	0	-	-	-	-	-	-	-	-	1	2	0	0	-	-	-	-	-	-	1	0	-	-	-	1	1	0	-	0	-	1	1	-	-	-	-	-	-	0	-	-	-	-	-	-	0	0	0	?	0	0	-	?	?	?	?	?	0	1	?	1	?	?	?	?	0	-	-	-	0	0	0	-	0	-	-	-	-	-	0	0	1	1	1	0	-	0	0	-	-	-	-	-	-	-	-	-	1	1	2	0	0	0	-	0	0	1	1	-	-	-	1	-	1	-	-	-	-	-	1	1	?	1	1	1	0	-	-	0	0	0	-	0	0	0	0	0	-	-	-	-	-	-	-	0	-	-	-	0	0	-	-	-	0	0	0	0	0	3	-	1	1	1	0	0	-	-	-	-	-	-	-	0	1	-	1	0	-	-	-	-	-	-	-	0	-	-	-	0	-	0	-	0	-	0	0	0	0	0	-	0	0	-	-	-	-	-	0	1	1	0	0	-	-	0	0	1	0	-	-	-	-	-	-	-	0	-	-	-	-	-	-	-	-	-	-	-	-	-	-	-	-	0	0	0	-	0	0	0	0	-	-	2	0	1	-	0	-	-	0	0	-	0	0	0	-	-
Sanctacaris	1	1	1	0	0	-	0	0	-	0	-	-	-	-	-	-	-	-	0	-	-	1	1	?	?	?	?	?	0	-	0	-	-	1	4	0	-	0	-	1	1	-	-	-	-	-	-	1	0	0	0	0	1	0	0	0	0	2	0	?	?	?	?	?	?	?	?	1	?	1	0	1	-	-	?	?	?	-	0	?	?	?	?	-	-	-	0	0	0	0	1	1	?	?	-	0	0	-	-	-	-	-	-	-	-	-	-	0	-	-	-	-	-	0	0	?	1	-	-	-	0	-	0	0	0	-	0	1	0	1	1	1	1	0	0	-	1	?	0	?	0	0	1	0	1	0	-	-	-	-	-	-	-	?	-	-	-	0	0	-	0	-	0	0	0	0	0	3	-	0	1	0	0	0	?	?	?	?	?	?	?	?	?	?	?	?	-	-	-	-	-	-	-	0	-	-	-	?	?	?	?	0	1	1	0	0	0	0	-	1	0	1	0	?	?	-	?	1	?	?	?	-	-	?	?	1	0	-	-	-	-	-	?	?	1	?	1	1	1	?	?	?	0	2	?	1	1	0	-	0	0	0	1	0	?	?	?	?	0	-	-	2	?	1	-	1	1	0	1	0	-	0	0	0	-	-
Habelia	1	1	1	0	0	-	0	0	-	0	-	-	-	-	-	-	-	-	0	-	-	1	1	?	?	?	?	?	0	-	0	-	-	1	4	0	-	0	-	1	1	-	-	-	-	-	-	1	0	0	0	0	1	0	0	0	0	2	0	?	?	?	?	?	?	?	?	1	?	1	0	1	-	-	?	?	?	-	0	0	?	?	?	-	-	-	0	0	0	0	1	1	?	?	-	0	0	-	-	-	-	-	-	-	-	-	-	0	-	-	-	-	-	0	0	0	1	-	-	-	0	-	0	0	0	-	0	1	0	1	1	1	1	0	0	-	1	?	0	?	0	0	1	0	1	0	-	-	-	-	-	-	-	?	-	-	-	0	0	-	0	-	0	0	0	0	0	3	-	0	1	0	0	0	-	-	-	-	-	-	-	?	?	?	?	?	-	-	-	-	-	-	-	0	-	-	-	1	1	0	-	0	1	1	0	0	0	0	-	1	0	1	0	1	1	-	?	1	1	0	0	-	-	?	?	1	0	-	-	-	-	-	-	-	1	0	1	1	1	?	?	?	0	2	(01)	1	1	0	-	0	0	0	1	0	0	0	0	0	0	-	-	2	?	1	-	1	0	0	1	0	-	0	0	0	-	-
Mollisonia	1	1	1	0	0	-	0	0	-	0	-	-	-	-	-	-	-	-	0	-	-	1	1	?	?	2	?	?	0	-	0	0	1	1	4	0	-	0	-	1	1	-	-	-	-	-	-	1	0	0	0	0	1	0	0	0	(01)	2	0	?	?	?	?	?	?	?	?	1	?	1	0	?	-	-	?	?	?	-	0	?	?	?	?	-	-	-	?	?	0	0	1	1	1	0	-	0	0	-	-	-	-	-	-	-	-	-	0	1	2	0	?	0	-	0	0	?	?	?	-	-	1	?	0	0	0	-	1	?	1	1	1	1	1	0	0	-	0	0	0	?	-	0	?	0	0	0	-	-	-	-	-	-	-	?	-	-	-	0	0	-	0	?	0	0	0	0	?	3	-	0	1	0	0	0	-	-	-	-	-	-	-	?	?	?	?	?	?	?	?	?	?	?	?	1	0	1	1	0	-	0	-	0	1	1	0	0	0	0	-	1	0	1	0	1	?	-	?	1	-	-	-	-	-	?	?	?	?	?	?	?	?	?	?	?	1	1	1	1	1	1	1	1	0	2	2	1	0	0	-	-	0	0	0	0	0	?	?	?	0	-	-	6	0	1	-	0	-	-	0	0	-	0	0	0	0	1
Offacolus	1	1	1	0	0	-	0	0	-	0	-	-	-	-	-	-	-	-	?	?	?	?	?	?	?	?	?	?	0	-	?	?	?	1	4	?	?	0	?	1	1	-	-	-	-	-	-	1	0	0	?	0	1	0	0	0	1	0	0	?	?	?	?	?	?	?	?	1	?	?	?	0	?	?	0	-	-	-	0	?	?	?	?	-	-	-	0	0	0	0	1	1	1	0	-	0	0	-	-	-	-	-	-	-	-	-	?	1	2	0	0	0	-	0	0	0	1	-	-	-	0	-	0	0	0	-	1	1	1	1	1	1	1	0	1	0	1	0	0	0	-	0	0	1	?	0	-	-	-	-	-	-	-	?	-	-	-	0	1	-	0	-	0	0	0	0	?	3	-	0	?	?	?	0	-	-	-	-	-	-	-	?	?	?	?	?	?	?	?	?	?	?	?	1	0	0	1	1	-	1	0	0	3	1	0	0	1	0	-	1	0	1	0	0	-	-	?	1	-	-	-	-	-	?	?	1	?	?	?	?	?	?	?	?	?	?	1	1	0	1	1	1	0	0	-	1	-	0	-	-	0	0	0	0	-	0	0	0	0	0	0	3	?	1	-	1	0	0	0	0	-	0	0	0	-	-
Dibasterium	1	1	1	0	?	-	0	0	-	0	-	-	-	-	-	-	-	-	?	?	?	?	?	?	?	?	?	?	0	-	?	?	?	1	3	0	-	0	-	1	1	-	-	-	-	-	-	1	0	0	0	0	1	0	0	0	0	2	0	?	?	?	?	?	?	?	?	1	?	?	?	0	?	?	0	-	-	-	0	?	?	?	?	-	-	-	0	0	0	0	1	1	1	0	-	0	0	-	-	-	-	-	-	-	-	-	?	1	2	0	0	0	-	0	0	0	1	-	-	-	0	-	0	0	0	-	1	1	1	1	1	1	1	0	1	0	1	0	0	0	-	0	0	1	?	0	-	-	-	-	-	-	-	?	-	-	-	0	1	-	0	-	0	0	0	0	?	3	-	0	?	?	?	?	?	?	?	?	?	?	?	?	?	?	?	?	?	?	?	?	?	?	?	0	-	-	-	1	-	1	0	0	1	1	1	0	1	0	-	1	0	1	0	0	-	-	?	1	-	-	-	-	-	?	?	1	?	?	?	?	?	?	?	?	?	?	1	1	0	1	1	1	0	0	-	1	-	0	-	-	0	0	0	0	-	0	0	0	0	0	0	3	?	1	-	1	0	0	1	0	-	0	0	0	-	-
Weinbergina	1	1	1	0	0	-	0	0	-	0	-	-	-	-	-	-	-	-	1	0	-	1	1	?	?	?	?	?	?	0	?	?	?	1	4	?	-	0	-	1	1	-	-	-	-	-	-	1	0	0	?	0	0	-	1	0	0	?	0	?	?	?	?	?	?	?	?	1	?	?	?	0	?	?	?	?	?	?	0	?	?	?	?	-	-	-	0	0	0	0	1	1	1	0	-	0	0	-	-	-	-	-	-	-	-	-	?	1	2	0	0	0	-	0	0	2	1	-	-	-	1	-	1	1	-	-	-	-	1	1	1	1	1	0	1	0	0	0	0	0	-	0	0	0	1	0	-	-	-	-	-	-	-	?	-	-	-	0	0	-	0	-	0	0	0	0	?	3	-	?	?	?	?	?	?	?	?	?	?	?	?	?	?	?	?	?	?	?	?	?	?	?	?	0	-	-	-	0	-	0	-	0	?	0	?	0	1	0	-	1	0	0	0	0	-	-	?	1	-	-	-	-	-	?	?	1	?	?	?	?	?	?	?	?	1	0	?	?	0	1	1	1	?	?	?	1	-	?	-	-	?	0	0	0	-	0	0	0	0	0	0	2	?	1	-	1	0	0	0	0	-	0	0	0	-	-
Limulus	1	1	1	0	0	-	0	0	-	0	-	-	-	-	-	-	-	-	1	0	-	1	1	0	?	?	0	1	1	1	-	-	-	1	4	0	-	0	-	1	1	-	-	-	-	-	-	1	0	0	1	1	0	-	1	0	1	0	0	1	1	0	0	0	0	0	0	1	1	1	0	0	-	-	0	-	-	-	0	0	1	1	0	-	-	-	0	0	0	0	1	1	1	0	-	0	0	-	-	-	-	-	-	-	-	-	1	1	2	0	0	0	-	0	0	0	1	-	-	-	1	-	1	1	-	-	-	-	1	1	1	1	1	0	1	0	0	0	0	0	-	0	0	1	1	0	-	-	-	-	-	-	-	0	-	-	-	0	1	-	0	-	0	0	0	0	1	3	-	0	1	0	1	0	-	-	-	-	1	1	1	0	1	1	1	0	0	0	0	0	1	0	0	1	1	1	1	0	-	0	-	0	1	1	0	0	1	0	-	1	0	0	0	0	-	-	0	1	-	-	-	-	-	0	0	1	1	0	0	1	0	0	0	-	1	0	1	1	0	1	1	1	0	2	1	1	-	0	-	-	0	0	0	1	-	0	0	0	0	0	0	3	0	1	-	1	0	0	0	0	-	0	0	0	1	1
Chasmataspis	1	1	1	0	0	-	0	0	-	0	-	-	-	-	-	-	-	-	1	0	-	1	1	?	?	?	?	?	1	(01)	-	-	-	1	?	?	-	0	-	1	1	-	-	-	-	-	-	0	1	0	1	0	0	-	?	0	1	2	0	?	?	?	?	?	?	?	?	1	?	?	?	0	?	?	?	?	?	?	0	?	1	1	1	-	-	-	0	0	0	0	1	1	1	0	-	0	0	-	-	-	-	-	-	-	-	-	?	1	?	?	?	?	-	0	0	?	1	-	-	-	1	-	1	1	-	-	-	-	1	1	1	1	1	?	1	?	0	0	0	0	-	0	0	0	?	0	-	-	-	-	-	-	-	?	-	-	-	0	1	-	0	-	0	0	0	0	?	3	-	?	?	?	?	?	?	?	?	?	?	?	?	?	?	?	?	?	?	?	?	?	?	?	?	1	0	0	0	1	1	1	0	0	1	?	1	0	1	0	-	1	0	0	0	0	-	-	?	1	-	-	-	-	-	?	?	1	?	?	?	0	0	?	?	?	?	?	?	?	0	?	?	?	?	?	?	1	-	?	-	-	?	0	0	1	-	0	0	0	0	?	?	6	?	1	-	1	0	0	0	0	-	0	0	0	-	-
Megalograptus	1	1	1	0	0	-	0	0	-	0	-	-	-	-	-	-	-	-	1	0	-	1	1	?	?	?	?	?	1	0	-	-	-	1	3	?	-	0	-	1	1	-	-	-	-	-	-	0	1	0	1	0	0	-	1	0	0	0	0	?	?	?	?	?	?	?	?	1	?	1	?	0	?	?	0	-	-	-	0	0	1	1	1	-	-	-	0	0	0	0	1	1	1	0	-	0	0	-	-	-	-	-	-	-	-	-	1	1	1	0	0	0	-	0	0	2	1	-	-	-	1	-	1	1	-	-	-	-	1	(01)	1	1	1	1	(01)	1	0	0	0	0	-	0	1	0	1	0	-	-	-	-	-	-	-	?	-	-	-	0	0	-	0	-	0	0	0	0	?	3	-	0	?	?	?	?	?	?	?	?	?	?	?	?	?	?	?	?	?	?	?	?	?	?	?	1	0	0	0	1	2	1	0	0	1	1	?	0	1	0	-	1	0	0	0	0	-	-	?	1	-	-	-	-	-	?	?	1	0	-	-	-	-	-	-	-	1	?	1	1	0	1	1	1	1	0	-	1	-	-	-	-	-	0	1	1	-	1	0	0	0	0	0	2	0	1	-	1	(01)	0	0	0	-	0	0	0	-	-
Scorpiones	1	1	1	0	0	-	0	0	-	0	-	-	-	-	-	-	-	-	1	0	-	1	(01)	0	0	0	0	1	1	0	-	-	-	1	3	1	1	0	0	1	1	-	-	-	-	-	-	0	1	1	0	0	0	-	0	0	0	2	0	1	1	0	0	0	0	0	0	1	1	1	0	0	-	-	0	-	-	-	0	0	1	1	1	-	-	-	0	0	0	0	1	1	1	0	-	0	0	-	-	-	-	-	-	-	-	-	0	1	2	0	0	0	-	0	0	2	1	-	-	-	1	-	1	1	-	-	-	-	1	1	1	1	1	1	1	1	0	0	0	0	-	0	0	0	0	0	-	-	-	-	-	-	-	0	-	-	-	0	0	-	0	-	0	0	0	0	0	3	-	0	0	-	-	1	1	2	0	0	0	0	-	0	1	1	1	1	0	1	1	1	0	0	1	1	0	0	0	1	2	1	0	0	1	1	1	0	1	0	-	0	(01)	-	-	-	-	-	0	1	-	-	-	-	-	1	1	1	0	-	-	-	-	-	-	-	1	1	1	1	0	1	1	1	1	0	-	1	-	-	-	-	-	0	0	0	-	0	0	0	0	1	2	2	0	1	-	1	0	0	0	0	-	0	0	0	-	-
Pseudoscorpiones	1	1	1	0	0	-	0	0	-	0	-	-	-	-	-	-	-	-	0	-	-	1	0	0	0	?	0	0	1	0	0	-	-	1	3	1	1	0	0	1	1	-	-	-	-	-	-	0	1	(01)	0	0	0	-	0	0	0	0	0	1	1	0	0	0	0	0	0	1	1	1	0	1	-	-	0	-	-	-	0	1	1	1	-	-	-	-	0	0	0	0	1	1	1	0	-	0	0	-	-	-	-	-	-	-	-	-	-	1	0	0	1	0	-	0	0	2	1	-	-	-	1	-	1	1	-	-	-	-	1	1	1	1	1	1	1	1	0	0	0	0	-	0	0	0	0	0	-	-	-	-	-	-	-	0	-	-	-	0	0	-	0	-	0	0	0	0	0	3	-	0	0	-	-	?	?	?	?	?	?	?	?	0	1	1	1	0	0	1	1	0	0	0	1	1	1	0	0	0	-	1	0	0	1	0	0	0	0	0	-	0	1	-	-	-	-	-	0	1	-	-	-	-	-	1	1	1	0	-	-	-	-	-	-	-	0	1	0	-	-	0	-	-	-	-	-	1	-	-	-	-	-	0	0	0	-	0	0	0	0	1	2	2	0	1	-	0	-	-	0	0	-	0	0	0	-	-
Opiliones	1	1	1	0	0	-	0	0	-	0	-	-	-	-	-	-	-	-	1	-	-	(01)	0	0	0	?	0	0	1	0	0	-	-	1	3	1	1	0	(01)	1	1	-	-	-	-	-	-	0	1	1	0	0	0	-	0	0	0	0	0	1	1	0	0	0	0	0	0	1	1	1	0	0	-	-	0	-	-	-	0	0	1	1	1	-	-	-	0	0	0	0	1	1	1	0	-	0	0	-	-	-	-	-	-	-	-	-	1	1	2	0	0	0	-	0	0	2	1	-	-	-	1	-	1	1	-	-	-	-	1	1	1	1	1	1	0	-	0	0	0	0	-	0	0	0	0	0	-	-	-	-	-	-	-	0	-	-	-	0	0	-	0	-	0	0	0	0	0	3	-	0	0	-	-	1	1	2	0	0	?	0	?	0	1	1	1	0	0	1	0	0	1	0	0	1	1	2	-	0	-	1	0	0	2	1	0	0	0	0	-	0	0	-	-	-	-	-	0	1	-	-	-	-	-	1	0	1	0	-	-	-	-	-	-	-	0	-	0	-	-	0	-	-	-	-	-	1	-	-	-	-	-	0	0	0	-	0	0	0	0	1	2	6	0	1	-	0	-	-	0	0	-	0	0	0	-	-
Palpigradi	1	1	1	0	-	-	0	0	-	0	-	-	-	-	-	-	-	-	0	-	-	0	-	-	-	-	-	-	-	-	-	-	-	1	3	1	1	0	1	1	1	-	-	-	-	-	-	0	1	1	0	0	0	-	0	0	0	0	0	1	1	0	0	0	0	0	0	1	1	1	0	0	-	-	0	-	-	-	0	0	1	0	0	-	-	-	0	0	0	0	1	1	1	0	-	0	0	-	-	-	-	-	-	-	-	-	1	1	2	0	0	0	-	0	0	2	1	-	-	-	1	-	1	1	-	-	-	-	1	1	1	1	1	0	0	-	0	0	0	0	-	0	0	0	0	0	-	-	-	-	-	-	-	0	-	-	-	0	0	-	0	-	0	0	0	0	0	3	-	0	0	-	-	?	?	?	?	?	?	?	?	0	1	1	1	0	1	0	0	0	1	0	0	1	1	2	-	0	-	1	1	0	1	0	0	1	0	0	-	0	1	-	-	-	-	-	0	1	-	-	-	-	-	1	1	1	0	-	-	-	-	-	-	-	0	1	0	-	-	0	-	-	-	-	-	1	-	-	-	-	-	0	0	0	-	0	0	0	0	0	0	2	0	1	-	1	0	1	0	0	-	0	0	0	-	-
Solifugae	1	1	1	0	0	-	0	0	-	0	-	-	-	-	-	-	-	-	1	0	-	(01)	0	0	0	?	0	0	1	0	0	-	-	1	3	1	1	0	0	1	1	-	-	-	-	-	-	0	1	1	0	0	0	-	0	0	0	0	0	1	1	0	0	0	0	0	0	1	0	1	0	1	-	-	0	-	-	-	0	1	1	1	0	-	-	-	0	0	0	0	1	1	1	0	-	0	0	-	-	-	-	-	-	-	-	-	-	1	0	0	1	0	-	0	0	1	1	-	-	-	1	-	1	1	-	-	-	-	1	1	1	1	1	1	0	-	0	0	0	0	-	0	0	0	0	0	-	-	-	-	-	-	-	0	-	-	-	0	0	-	0	-	0	0	0	0	0	3	-	0	0	-	-	?	?	?	?	?	?	?	?	0	1	1	1	1	1	0	1	1	0	0	0	1	1	2	-	0	-	1	0	0	1	0	0	1	0	0	-	0	1	-	-	-	-	-	0	1	-	-	-	-	-	1	0	1	0	-	-	-	-	-	-	-	0	-	0	-	-	0	-	-	-	-	-	1	-	-	-	-	-	0	0	0	-	0	0	0	0	0	1	2	0	1	-	0	-	-	0	0	-	0	0	0	-	-
Ricinulei	1	1	1	0	0	-	0	0	-	0	-	-	-	-	-	-	-	-	0	-	-	1	0	0	0	?	0	0	1	0	0	-	-	1	3	1	1	0	0	1	1	-	-	-	-	-	-	0	1	0	0	0	0	-	0	0	0	2	0	1	1	0	0	0	0	0	0	1	1	1	0	0	-	-	0	-	-	-	0	1	1	1	0	-	-	-	0	0	0	0	1	1	1	0	-	0	0	-	-	-	-	-	-	-	-	-	-	1	1	(01)	1	0	-	0	0	1	1	-	-	-	1	-	1	1	-	-	-	-	1	1	1	1	1	1	1	0	0	0	0	0	-	0	0	0	0	0	-	-	-	-	-	-	-	0	-	-	-	0	0	-	0	-	0	0	0	0	0	3	-	0	0	-	-	?	?	?	?	?	?	?	?	0	1	1	1	1	1	0	0	1	1	0	0	1	1	2	-	0	-	1	1	0	1	0	1	1	0	1	0	0	0	-	-	-	-	-	0	1	-	-	-	-	-	1	0	1	0	-	-	-	-	-	-	-	0	-	0	-	-	0	-	-	-	-	-	1	-	-	-	-	-	0	0	0	-	0	0	0	0	0	1	4	0	1	-	0	-	-	0	0	-	0	0	0	-	-
Haptopoda	1	1	1	0	0	-	0	0	-	0	-	-	-	-	-	-	-	-	1	0	-	1	0	0	0	?	0	0	1	1	0	-	-	1	3	1	1	0	?	1	1	-	-	-	-	-	-	0	1	0	0	0	0	-	0	0	0	2	0	1	?	0	0	0	0	0	0	1	1	1	0	0	-	-	0	-	-	-	0	0	1	0	0	-	-	-	1	1	0	0	1	1	1	0	-	0	0	-	-	-	-	-	-	-	-	-	-	1	1	1	1	0	-	0	0	2	1	-	-	-	1	-	1	1	-	-	-	-	1	1	1	1	1	1	0	-	0	0	0	0	-	1	0	0	0	0	-	-	-	-	-	-	-	0	-	-	-	0	0	-	0	-	0	0	0	0	0	3	-	0	0	-	-	?	?	?	?	?	?	?	?	0	1	1	1	1	1	0	0	0	1	?	?	1	1	0	?	0	-	1	1	0	1	0	1	0	?	0	-	0	0	-	-	-	-	-	0	1	-	-	-	-	-	1	1	1	0	-	-	-	-	-	-	-	0	-	?	?	?	?	?	?	?	?	?	1	-	-	-	-	-	0	0	0	-	0	0	0	0	0	0	?	?	1	-	0	-	-	0	0	-	0	0	0	-	-
Trigonotarbida	1	1	1	0	0	-	0	0	-	0	-	-	-	-	-	-	-	-	1	0	-	1	0	0	0	?	0	0	1	0	0	-	-	1	3	1	1	0	1	1	1	-	-	-	-	-	-	0	1	0	0	0	0	-	0	0	0	2	0	1	?	0	0	0	0	0	0	1	1	1	0	0	-	-	0	-	-	-	0	1	1	1	?	-	-	-	?	?	0	0	1	1	1	0	-	0	0	-	-	-	-	-	-	-	-	-	-	1	1	1	1	0	-	0	0	2	1	-	-	-	1	-	1	1	-	-	-	-	1	1	1	1	1	1	1	0	0	0	0	0	-	0	0	0	0	0	-	-	-	-	-	-	-	0	-	-	-	0	0	-	0	-	0	0	0	0	0	3	-	0	0	-	-	?	?	?	?	?	?	?	?	0	1	1	1	1	1	0	0	0	1	?	?	1	1	0	?	0	-	1	1	0	1	0	1	1	1	0	-	0	0	-	-	-	-	-	0	1	-	-	-	-	-	1	0	1	0	-	-	-	-	-	-	-	0	-	1	1	0	1	0	-	1	0	-	1	-	-	-	-	-	0	0	0	-	0	0	0	0	0	0	2	?	1	-	0	-	-	0	0	-	0	0	0	-	-
Thelyphonida	1	1	1	0	0	-	0	0	-	0	-	-	-	-	-	-	-	-	1	0	-	1	0	0	0	?	0	0	1	0	0	-	-	1	3	1	1	0	1	1	1	-	-	-	-	-	-	0	1	0	0	0	0	-	0	0	0	0	0	1	1	0	0	0	0	0	0	1	1	1	0	0	-	-	0	-	-	-	0	1	1	0	0	-	-	-	1	1	0	0	1	1	1	0	-	0	0	-	-	-	-	-	-	-	-	-	-	1	1	1	1	0	-	0	0	2	1	-	-	-	1	-	1	1	-	-	-	-	1	1	1	1	1	1	1	1	0	0	0	0	-	1	0	0	0	0	-	-	-	-	-	-	-	0	-	-	-	0	0	-	0	-	0	0	0	0	0	3	-	0	0	-	-	1	0	-	-	-	1	1	0	0	1	1	1	1	1	0	0	0	1	1	0	1	1	0	0	0	-	1	1	0	1	0	0	1	1	0	-	0	0	-	-	-	-	-	0	1	-	-	-	-	-	1	1	1	0	-	-	-	-	-	-	-	0	1	1	1	0	1	0	-	1	0	-	1	-	-	-	-	-	0	0	0	-	0	0	0	1	0	0	2	0	1	-	1	0	1	0	0	-	0	0	0	-	-
Schizomida	1	1	1	0	-	-	0	0	-	0	-	-	-	-	-	-	-	-	0	-	-	0	-	-	-	-	-	-	-	-	-	-	-	1	3	1	1	0	1	1	1	-	-	-	-	-	-	0	1	1	0	0	0	-	0	0	0	0	0	1	1	0	0	0	0	0	0	1	1	1	0	0	-	-	0	-	-	-	0	1	1	0	0	-	-	-	1	1	0	0	1	1	1	0	-	0	0	-	-	-	-	-	-	-	-	-	-	1	1	1	1	1	-	0	0	2	1	-	-	-	1	-	1	1	-	-	-	-	1	1	1	1	1	1	1	0	0	0	0	0	-	1	0	0	0	0	-	-	-	-	-	-	-	0	-	-	-	0	0	-	0	-	0	0	0	0	0	3	-	0	0	-	-	1	0	-	-	-	1	1	0	0	1	1	1	1	1	0	0	0	0	1	0	1	1	2	-	0	-	1	1	0	1	0	0	1	1	0	-	0	0	-	-	-	-	-	0	1	-	-	-	-	-	1	1	1	0	-	-	-	-	-	-	-	0	1	1	1	0	1	0	-	1	0	-	1	-	-	-	-	-	0	0	0	-	0	0	0	1	0	0	2	0	1	-	0	-	-	0	0	-	0	0	0	-	-
Amblypygi	1	1	1	0	0	-	0	0	-	0	-	-	-	-	-	-	-	-	(01)	0	-	1	0	0	0	?	0	0	1	1	0	-	-	1	3	1	1	0	1	1	1	-	-	-	-	-	-	0	1	1	0	0	0	-	0	0	0	0	0	1	0	0	0	0	0	0	0	1	1	1	0	0	-	-	0	-	-	-	0	1	1	0	0	-	-	-	0	1	0	0	1	1	1	0	-	0	0	-	-	-	-	-	-	-	-	-	-	1	1	1	1	1	-	0	0	2	1	-	-	-	1	-	1	1	-	-	-	-	1	1	1	1	1	1	(01)	1	0	0	0	0	-	1	0	0	0	0	-	-	-	-	-	-	-	0	-	-	-	0	0	-	0	-	0	0	0	0	0	3	-	0	1	0	0	1	0	-	-	-	1	1	0	0	1	1	1	1	1	0	0	0	1	1	0	1	1	2	-	0	-	1	1	0	1	0	0	1	1	0	-	0	0	-	-	-	-	-	0	1	-	-	-	-	-	1	1	1	0	-	-	-	-	-	-	-	0	-	1	1	0	1	0	-	1	0	-	1	-	-	-	-	-	0	0	0	-	0	0	0	1	0	0	2	0	1	-	0	-	-	0	0	-	0	0	0	-	-
Uraraneida	1	1	1	0	?	-	0	0	-	0	-	-	-	-	-	-	-	-	?	?	?	?	?	?	?	?	?	?	?	?	?	?	?	1	3	1	1	0	?	1	1	-	-	-	-	-	-	0	1	0	0	0	0	-	0	0	0	0	0	1	?	0	0	0	0	0	0	1	1	1	0	0	-	-	0	-	-	-	0	0	1	1	0	-	-	-	0	?	0	0	1	1	1	0	-	0	0	-	-	-	-	-	-	-	-	-	-	1	1	1	1	0	-	0	0	2	1	-	-	-	1	-	1	1	-	-	-	-	1	1	1	1	1	1	0	-	0	0	0	0	-	0	0	0	0	0	-	-	-	-	-	-	-	0	-	-	-	0	0	-	0	-	0	0	0	0	0	3	-	0	0	-	-	?	?	?	?	?	?	?	?	0	1	1	1	1	1	0	0	0	1	?	?	1	1	2	-	0	-	1	0	0	1	0	0	1	?	0	-	0	0	-	-	-	-	-	0	1	-	-	-	-	-	1	0	1	0	-	-	-	-	-	-	-	?	?	?	?	?	?	?	?	?	?	?	1	-	-	-	-	-	0	0	0	-	0	0	0	0	0	0	?	?	1	-	1	0	1	0	0	-	0	0	0	-	-
Araneae	1	1	1	0	0	-	0	0	-	0	-	-	-	-	-	-	-	-	1	(02)	0	1	0	0	0	1	0	0	1	0	0	-	-	1	3	0	-	0	1	1	1	-	-	-	-	-	-	0	1	0	0	0	0	-	0	0	0	0	0	1	0	0	0	0	0	0	0	1	1	1	0	0	-	-	0	-	-	-	0	1	1	1	0	-	-	-	0	?	0	0	1	1	1	0	-	0	0	-	-	-	-	-	-	-	-	-	-	1	1	1	1	0	-	0	0	2	1	-	-	-	1	-	1	1	-	-	-	-	1	1	1	1	1	1	0	-	0	0	0	0	-	0	0	0	0	0	-	-	-	-	-	-	-	0	-	-	-	0	0	-	0	-	0	0	0	0	0	3	-	0	1	0	0	1	0	-	-	-	1	1	0	0	1	1	1	1	1	0	0	0	1	1	0	1	1	2	-	0	-	1	0	0	1	-	0	1	1	0	-	0	0	-	-	-	-	-	0	1	-	-	-	-	-	1	1	1	0	-	-	-	-	-	-	-	0	1	1	1	0	1	0	-	1	0	-	1	-	-	-	-	-	0	0	0	-	0	0	0	1	0	0	2	0	1	-	0	-	-	0	0	-	0	0	0	-	-
Acari	1	1	1	0	0	-	0	0	-	0	-	-	-	-	-	-	-	-	(01)	-	-	(01)	0	0	0	?	0	0	1	0	0	-	-	1	3	1	1	0	0	1	1	-	-	-	-	-	-	0	1	0	0	0	0	-	0	0	0	0	0	1	0	0	0	0	0	0	0	1	1	1	0	1	-	-	0	-	-	-	0	(01)	1	1	?	-	-	-	0	0	0	0	1	1	1	0	-	0	0	-	-	-	-	-	-	-	-	-	0	1	0	0	(01)	0	-	0	0	1	1	-	-	-	1	-	1	1	-	-	-	-	1	1	1	1	1	1	0	-	0	0	0	0	-	(01)	0	0	0	0	-	-	-	-	-	-	-	0	-	-	-	0	0	-	0	-	0	0	0	0	0	3	-	0	0	-	-	1	1	2	0	1	1	1	0	0	1	1	1	(01)	1	0	0	0	1	0	0	1	1	1	0	0	-	1	(01)	0	(123)	-	0	0	0	(01)	0	0	0	-	-	-	-	-	0	1	-	-	-	-	-	1	(01)	1	0	-	-	-	-	-	-	-	0	-	0	-	-	0	-	-	-	-	-	1	-	-	-	-	-	0	0	0	-	0	0	0	0	0	1	4	0	1	-	0	-	-	0	0	-	0	0	0	-	-
Occacaris	1	1	1	0	0	-	0	0	-	0	-	-	-	-	-	-	-	-	0	-	-	1	1	?	?	?	?	?	0	-	?	?	?	1	?	?	?	0	?	1	0	0	1	1	0	0	0	-	-	-	-	-	?	?	?	0	-	-	-	?	?	?	?	?	?	?	?	?	?	?	?	?	?	?	?	?	?	?	0	?	?	?	?	?	?	-	-	-	?	1	1	1	1	1	0	0	1	1	0	-	-	-	-	-	-	0	0	0	-	-	-	-	-	0	?	?	?	?	?	?	?	?	?	-	?	?	?	?	0	?	?	?	?	?	?	?	?	?	?	?	?	0	?	?	?	?	?	?	?	?	?	0	-	?	?	?	?	0	?	?	?	?	?	?	?	0	?	?	?	0	?	?	?	?	?	?	?	?	?	?	?	?	?	?	?	?	-	-	-	-	-	-	-	0	-	-	-	?	?	?	?	?	?	?	?	0	0	?	?	0	?	?	?	?	?	-	?	1	?	?	?	?	?	?	?	?	?	?	?	?	?	?	?	?	?	?	?	?	?	?	?	?	?	?	?	?	?	?	?	?	?	?	?	?	?	?	?	?	?	?	?	?	?	?	-	?	?	?	?	?	?	?	?	?	?	?
Clypecaris	1	1	1	0	0	-	0	0	-	0	-	-	-	-	-	-	-	-	0	-	-	1	1	?	?	?	?	?	0	-	1	?	?	1	?	?	?	0	?	1	0	0	1	1	0	?	1	-	-	-	-	-	?	?	?	0	-	-	-	?	?	?	?	?	?	?	?	?	?	?	?	?	?	?	?	?	?	?	0	?	?	?	?	?	?	-	-	-	0	?	1	0	1	1	-	0	0	-	-	-	-	-	-	-	-	0	?	0	-	-	-	-	0	0	?	?	?	?	?	?	?	?	?	-	?	?	?	?	0	?	?	?	?	?	?	?	?	?	?	?	?	0	?	?	?	?	?	?	?	?	?	0	-	?	?	?	?	0	?	?	?	?	?	?	?	0	?	?	?	0	?	?	?	0	-	-	-	-	-	-	-	?	?	?	?	?	-	-	-	-	-	-	-	0	-	-	-	1	?	1	0	1	-	?	?	0	0	0	-	0	1	-	-	-	-	-	?	1	0	?	?	?	?	?	?	?	?	?	?	?	?	?	?	?	?	?	?	?	?	?	?	?	?	?	0	0	1	0	-	?	?	?	?	0	?	?	?	?	?	-	-	?	?	1	-	0	-	-	0	1	0	0	0	0	-	-
Ercaicunia	1	1	1	0	0	-	0	0	-	0	-	-	-	-	-	-	-	-	0	-	-	?	?	?	?	?	?	?	0	-	?	?	?	1	?	?	?	0	?	1	0	0	1	1	0	1	1	-	-	-	-	-	?	?	0	0	-	-	-	?	?	?	?	?	?	?	?	?	?	?	?	?	?	?	?	?	?	?	0	?	?	?	0	?	?	-	-	-	?	0	1	0	0	-	-	-	0	-	-	-	-	-	-	-	-	-	-	0	-	-	-	-	1	0	?	?	?	?	?	?	?	?	?	?	?	?	?	?	0	?	?	?	1	1	0	-	0	?	0	0	-	?	?	?	?	?	?	?	?	?	?	0	-	?	?	?	?	0	?	?	?	?	0	?	?	0	?	3	-	0	?	?	?	?	?	?	?	?	?	?	?	?	?	?	?	?	-	-	-	-	-	-	-	0	-	-	-	0	-	1	0	1	-	0	-	0	0	?	?	0	1	-	-	-	-	-	?	1	0	0	0	-	-	?	?	1	1	1	?	?	?	?	?	?	0	-	1	1	?	0	-	-	-	-	-	0	0	0	-	?	?	1	0	0	?	?	?	?	?	-	-	?	?	1	-	0	-	-	0	1	2	0	0	0	-	-
Canadaspis	1	1	1	0	0	-	0	0	-	0	-	-	-	-	-	-	-	-	0	-	-	1	1	?	?	?	?	?	0	-	1	1	0	1	?	1	(01)	0	0	1	0	0	1	1	0	0	1	-	-	-	-	-	?	?	0	0	-	-	-	?	?	?	?	?	?	?	?	1	?	?	?	?	?	?	?	?	?	?	0	?	?	?	0	?	?	-	-	-	1	0	1	0	0	-	-	-	0	-	-	-	-	-	-	-	-	-	-	0	-	-	-	-	0	0	?	?	?	?	?	?	?	?	?	-	?	?	?	?	0	?	?	?	?	?	?	?	?	0	0	0	?	0	?	?	?	?	?	?	?	?	?	0	-	?	?	?	?	0	0	?	?	?	0	?	?	0	?	3	-	0	?	?	?	?	?	?	?	?	?	?	?	?	?	?	?	?	-	-	-	-	-	-	-	0	-	-	-	1	0	1	0	0	(01)	0	-	0	0	0	-	0	1	-	-	-	-	-	?	1	0	0	?	?	?	?	?	1	1	1	1	?	0	0	?	?	0	-	1	1	0	1	1	0	0	2	0	0	1	0	-	0	?	?	0	0	1	1	0	0	0	-	-	2	?	1	-	0	-	-	1	1	0	1	0	0	-	-
Perspicaris	1	1	1	0	0	-	0	0	-	0	-	-	-	-	-	-	-	-	0	-	-	1	1	?	?	?	?	?	0	-	1	?	1	1	?	0	-	0	-	1	0	0	1	1	0	0	1	-	-	-	-	-	?	-	?	0	-	-	-	?	?	?	?	?	?	?	?	?	?	?	?	?	?	?	?	?	?	?	0	?	?	?	?	?	?	-	-	-	?	0	1	0	0	-	-	-	0	-	-	-	-	-	-	-	-	-	-	0	-	-	-	-	0	0	?	?	?	?	?	?	?	?	?	-	?	?	?	?	0	?	?	?	?	?	?	?	?	?	?	?	?	0	?	?	?	?	?	?	?	?	?	0	-	?	?	?	?	0	?	?	?	?	?	?	?	0	?	3	-	0	?	?	?	?	?	?	?	?	?	?	?	?	?	?	?	?	-	-	-	-	-	-	-	0	-	-	-	?	?	1	0	0	0	?	-	0	0	?	?	0	1	-	-	-	-	-	?	1	?	?	?	?	?	?	?	?	?	?	?	?	?	?	?	?	?	?	1	1	?	?	?	?	?	2	0	?	?	?	-	?	?	?	?	0	?	?	?	?	?	-	-	?	?	1	-	0	-	-	0	1	0	0	0	0	-	-
Waptia	1	1	1	0	0	-	0	0	-	0	-	-	-	-	-	-	-	-	0	-	-	1	1	?	?	?	?	?	0	-	1	1	1	1	4	1	1	0	0	1	0	0	1	1	0	1	1	-	-	-	-	-	1	-	0	0	-	-	-	?	?	?	?	?	?	?	?	1	?	1	0	1	-	-	0	-	-	-	0	0	?	?	?	-	-	-	-	-	0	0	1	0	0	-	-	-	0	-	-	-	-	-	-	-	-	-	-	0	-	-	-	-	1	0	1	-	0	1	1	1	1	1	1	0	-	-	-	-	0	1	1	1	0	-	-	-	-	-	-	-	-	0	1	0	0	1	1	0	0	1	0	0	-	?	0	1	1	0	0	-	0	1	0	0	?	0	0	3	-	0	?	?	?	0	-	-	-	-	-	-	-	?	?	?	?	?	-	-	-	-	-	-	-	0	-	-	-	1	2	1	0	0	0	1	-	0	0	1	1	0	1	-	-	-	-	-	?	1	-	-	0	-	-	?	?	1	?	0	0	0	?	?	?	?	0	-	0	-	-	1	1	0	0	-	-	1	-	0	-	0	1	?	0	0	-	0	0	1	0	-	-	4	?	1	-	0	-	-	0	1	2	0	0	0	-	-
Branchiocaris	1	1	1	0	?	-	0	0	-	0	-	-	-	-	-	-	-	-	0	-	-	?	?	?	?	?	?	?	0	-	?	?	0	1	2	1	0	0	0	1	0	0	1	2	0	0	0	-	-	-	-	-	1	-	1	0	-	-	-	?	?	?	?	?	?	?	?	1	?	1	0	1	-	-	0	-	-	-	0	?	1	?	0	0	1	-	-	-	0	0	1	0	0	-	-	-	0	-	-	-	-	-	-	-	-	-	-	0	-	-	-	-	0	0	?	?	0	1	1	?	?	?	?	-	?	?	?	?	0	0	1	?	0	-	-	-	-	-	-	-	-	0	?	0	0	1	?	-	0	1	?	0	-	?	0	?	?	0	?	?	?	?	0	0	1	0	0	3	-	0	?	?	?	0	-	-	-	-	-	-	-	?	?	?	?	?	-	-	-	-	-	-	-	0	-	-	-	1	?	0	-	1	-	0	-	0	0	0	-	0	1	-	-	-	-	-	?	1	1	0	1	-	1	?	?	1	1	1	1	?	0	0	?	?	0	-	1	1	0	0	-	-	-	2	0	0	1	0	1	0	?	?	0	0	0	?	0	0	0	-	-	?	?	1	-	0	-	-	0	1	0	0	0	0	?	?
Tokummia	1	1	1	0	?	-	0	0	-	0	-	-	-	-	-	-	-	-	0	-	-	?	?	?	?	?	?	?	0	-	?	?	0	1	2	1	1	0	0	1	0	0	1	2	0	0	0	-	-	-	-	-	1	-	1	0	-	-	-	?	?	?	?	?	?	?	?	1	?	1	0	1	-	-	0	-	-	-	0	?	1	?	0	0	1	-	-	-	0	0	1	0	0	-	-	-	0	-	-	-	-	-	-	-	-	-	-	0	-	-	-	-	0	0	?	?	0	1	1	?	?	?	?	-	?	?	?	?	0	0	1	?	0	-	-	-	-	-	-	-	-	0	?	0	0	1	?	-	0	1	0	0	-	?	0	?	?	0	0	?	?	?	0	0	1	0	0	3	-	0	?	?	?	0	-	-	-	-	-	-	-	?	?	?	?	?	-	-	-	-	-	-	-	0	-	-	-	1	(02)	0	-	1	-	0	-	0	0	0	-	0	1	-	-	-	-	-	?	1	1	0	1	-	1	?	?	1	1	1	1	1	0	0	?	?	0	-	1	1	0	0	-	-	-	2	0	0	1	0	1	0	?	?	0	0	0	1	0	0	0	-	-	4	?	1	-	0	-	-	0	1	1	0	0	0	?	?
Odaraia	1	1	1	0	0	-	0	0	-	0	-	-	-	-	-	-	-	-	0	-	-	1	1	?	?	?	?	?	0	-	1	?	1	1	?	?	?	0	?	1	0	0	1	3	1	1	0	-	-	-	-	-	?	-	?	0	-	-	-	?	?	?	?	?	?	?	?	1	?	?	?	?	?	?	?	?	?	?	0	?	?	?	0	-	-	-	-	-	0	?	1	?	0	-	-	-	?	?	-	-	-	-	-	-	-	0	?	?	?	?	?	?	?	0	?	?	?	?	?	?	?	?	?	-	?	?	?	?	0	?	?	?	?	?	?	?	?	?	?	?	?	0	?	0	?	?	?	?	?	?	?	0	-	?	?	?	?	0	?	?	?	?	?	?	?	0	?	?	?	0	?	?	?	1	?	?	?	0	?	0	-	?	?	?	?	?	-	-	-	-	-	-	-	0	-	-	-	?	?	0	-	1	-	0	-	0	0	0	-	0	1	-	-	-	-	-	?	1	0	0	0	-	-	?	?	1	1	1	?	?	0	0	?	?	0	-	1	1	0	0	-	-	-	?	?	0	1	0	1	?	?	?	0	0	?	0	0	0	0	-	-	?	?	1	-	1	0	0	1	1	0	0	0	0	-	-
Nereocaris	1	1	1	0	0	-	0	0	-	0	-	-	-	-	-	-	-	-	0	-	-	1	1	?	?	?	?	?	0	-	1	?	1	1	?	?	?	0	?	1	0	0	1	3	1	1	0	-	-	-	-	-	?	-	?	0	-	-	-	?	?	?	?	?	?	?	?	?	?	?	?	?	?	?	?	?	?	?	0	?	?	?	?	?	?	-	-	-	?	?	1	?	0	-	-	-	?	?	-	-	-	-	-	-	-	0	?	?	?	?	?	?	?	0	?	?	?	?	?	?	?	?	?	-	?	?	?	?	0	?	?	?	?	?	?	?	?	?	?	?	?	0	?	?	?	?	?	?	?	?	?	0	-	?	?	?	?	0	?	?	?	?	?	?	?	0	?	3	-	0	?	?	?	?	?	?	?	?	?	?	?	?	?	?	?	?	-	-	-	-	-	-	-	0	-	-	-	?	?	1	0	1	-	?	-	0	0	?	?	0	1	-	-	-	-	-	?	1	0	?	?	?	?	?	?	?	?	?	?	?	?	?	?	?	?	?	?	?	?	?	?	?	?	?	?	0	0	?	-	?	?	?	?	0	0	?	?	?	0	-	-	?	?	1	-	0	-	-	0	1	0	0	0	0	-	-
Shankouia	1	1	1	0	0	-	0	0	-	0	-	-	-	-	-	-	-	-	0	-	-	1	1	?	?	?	?	?	0	-	1	?	1	1	4	1	0	0	0	1	0	1	-	-	-	-	-	-	-	-	-	-	1	-	1	0	-	-	-	?	?	?	?	?	?	?	?	1	?	1	1	0	?	?	1	0	0	?	0	0	1	?	0	-	-	-	-	-	0	0	1	0	0	-	-	-	0	-	-	-	-	-	-	-	-	-	-	0	-	-	-	-	1	0	2	-	0	1	1	?	1	?	1	?	-	-	-	-	?	?	?	?	0	-	-	-	-	-	-	-	-	0	?	0	0	1	1	1	0	1	0	0	-	?	?	?	?	0	?	?	?	?	0	0	1	0	?	3	-	0	?	?	?	?	?	?	?	?	?	?	?	?	?	?	?	?	-	-	-	-	-	-	-	0	-	-	-	0	-	0	-	1	-	1	0	0	0	0	-	1	0	0	1	?	-	-	?	1	0	2	0	-	-	?	?	1	?	?	?	?	?	?	?	?	?	?	1	1	0	0	-	-	-	2	0	0	1	0	1	0	0	0	0	0	?	0	0	0	0	-	-	6	?	1	-	1	0	0	?	1	3	0	1	0	-	-
Fuxianhuia	1	1	1	0	0	-	0	0	-	0	-	-	-	-	-	-	-	-	0	-	-	1	1	?	?	2	?	?	0	-	1	1	1	1	4	1	0	0	0	1	0	0	0	-	-	-	-	-	-	-	-	-	1	-	1	0	-	-	-	?	?	?	?	?	?	?	?	?	?	1	1	0	1	0	1	0	0	0	0	0	1	?	0	-	-	-	-	-	0	0	1	0	0	-	-	-	0	-	-	-	-	-	-	-	-	-	-	0	-	-	-	-	1	0	2	-	0	1	1	?	?	?	?	?	?	?	?	?	?	?	?	?	0	-	-	-	-	-	-	-	-	0	1	0	0	1	1	1	0	1	0	0	-	?	0	?	?	0	?	?	?	?	0	0	1	0	?	3	-	0	0	-	-	?	?	?	?	?	?	?	?	?	?	?	?	?	-	-	-	-	-	-	-	0	-	-	-	1	0	1	0	1	-	1	0	0	0	1	0	1	1	0	1	0	-	-	?	1	0	2	0	-	-	?	?	1	1	1	1	?	0	0	?	?	0	-	1	1	0	0	-	-	-	2	0	0	1	0	-	0	0	0	0	0	1	0	0	0	0	-	-	6	?	1	-	1	0	0	?	1	0	0	0	0	-	-
Chengjiangocaris	1	1	1	0	0	-	0	0	-	0	-	-	-	-	-	-	-	-	0	-	-	1	1	?	?	?	?	?	0	-	1	1	1	1	4	1	0	0	0	1	0	1	-	-	-	-	-	-	-	-	-	-	1	-	1	0	-	-	-	0	1	?	?	?	?	?	?	?	?	1	1	0	1	0	1	0	0	0	0	0	1	?	0	-	-	-	-	-	0	0	1	0	0	-	-	-	0	-	-	-	-	-	-	-	-	-	-	0	-	-	-	-	1	0	2	-	0	1	1	0	1	0	1	1	-	-	-	-	1	1	0	0	0	-	-	-	-	-	-	-	-	0	1	0	0	1	1	1	0	1	0	0	-	?	0	0	-	0	0	-	0	1	0	0	1	0	?	3	-	0	?	?	?	?	?	?	?	?	?	?	?	?	1	?	?	?	-	-	-	-	-	-	-	0	-	-	-	0	-	0	-	1	-	1	0	0	0	1	0	1	0	1	1	0	-	-	?	1	0	2	0	-	-	?	?	1	1	1	1	1	0	0	?	?	0	-	1	1	0	0	-	-	-	2	0	0	1	0	1	0	0	0	0	0	1	0	0	0	0	-	-	6	?	1	-	0	-	-	?	1	?	?	?	?	-	-
Alacaris	1	1	1	0	0	-	0	0	-	0	-	-	-	-	-	-	-	-	0	-	-	1	1	?	?	?	?	?	0	-	1	1	1	1	4	1	0	0	0	1	0	1	-	-	-	-	-	-	-	-	-	-	1	-	1	0	-	-	-	?	?	?	?	?	?	?	?	?	?	1	1	0	1	0	1	0	0	0	0	0	1	?	0	-	-	-	-	-	0	0	1	0	0	-	-	-	0	-	-	-	-	-	-	-	-	-	-	0	-	-	-	-	1	0	2	-	0	1	1	0	1	0	1	1	-	-	-	-	1	1	0	0	0	-	-	-	-	-	-	-	-	0	1	0	0	1	1	1	0	1	0	0	-	?	0	0	-	0	0	-	0	1	0	0	1	0	?	3	-	0	?	?	?	?	?	?	?	?	?	?	?	?	?	?	?	?	-	-	-	-	-	-	-	0	-	-	-	0	-	1	0	1	-	1	0	0	0	1	0	1	0	1	1	0	-	-	?	1	0	2	0	-	-	?	?	1	1	1	1	1	0	0	?	?	0	-	1	1	0	0	-	-	-	2	0	0	1	0	-	0	0	0	0	0	1	0	0	0	0	-	-	6	?	1	-	0	-	-	?	1	3	0	0	0	-	-
Xiaocaris	1	1	1	0	0	-	0	0	-	0	-	-	-	-	-	-	-	-	0	-	-	1	1	?	?	?	?	?	0	-	1	1	1	1	?	1	0	0	0	1	0	1	-	-	-	-	-	-	-	-	-	-	1	-	1	0	-	-	-	?	?	?	?	?	?	?	?	1	?	1	1	0	1	0	1	0	0	0	0	0	?	?	0	-	-	-	-	-	0	0	1	0	0	-	-	-	0	-	-	-	-	-	-	-	-	-	-	0	-	-	-	-	1	0	2	-	0	1	1	?	?	?	?	?	?	?	?	?	1	1	0	?	0	-	-	-	-	-	-	-	-	0	?	?	?	?	?	?	?	?	?	?	?	?	?	?	?	0	?	?	?	?	0	?	?	0	?	3	-	0	?	?	?	?	?	?	?	?	?	?	?	?	?	?	?	?	-	-	-	-	-	-	-	0	-	-	-	0	-	1	0	0	0	1	0	0	0	1	0	1	0	0	1	0	-	-	?	1	0	2	0	-	-	?	?	1	?	?	?	?	0	0	?	?	0	-	0	-	-	-	-	-	-	-	-	0	1	-	-	-	-	0	0	0	1	0	1	0	0	-	-	6	?	1	-	0	-	-	?	1	0	0	0	0	-	-
Sottyxerxes	1	1	1	0	0	-	0	0	-	0	-	-	-	-	-	-	-	-	0	-	-	1	1	?	?	?	?	?	0	-	0	-	-	1	?	1	2	0	0	1	1	-	-	-	-	-	-	0	0	0	0	0	1	1	1	0	0	0	0	?	?	?	?	?	?	?	?	1	?	1	1	0	1	2	1	0	0	0	0	0	1	0	0	-	-	-	-	-	0	0	1	0	0	-	-	-	0	-	-	-	-	-	-	-	-	-	-	0	-	-	-	-	1	0	?	-	0	1	1	?	?	?	?	-	?	?	?	?	0	?	?	?	0	-	-	-	-	-	-	-	-	0	?	0	0	?	?	?	?	?	?	?	?	?	?	?	?	0	?	?	?	?	0	?	1	0	?	3	-	0	?	?	?	?	?	?	?	?	?	?	?	?	?	?	?	?	-	-	-	-	-	-	-	0	-	-	-	1	0	1	0	1	-	0	0	0	0	1	1	1	1	0	0	1	0	-	?	1	0	2	0	-	-	?	?	1	?	0	0	0	?	?	?	?	0	-	0	-	-	-	-	-	-	-	-	0	1	-	-	-	-	0	0	0	0	0	0	0	0	-	-	6	?	1	-	1	0	0	?	0	-	0	0	0	-	-
Apankura	1	1	1	0	0	-	0	0	-	0	-	-	-	-	-	-	-	-	0	-	-	1	1	?	?	?	?	?	0	-	0	-	-	1	?	1	2	0	0	1	1	-	-	-	-	-	-	?	?	?	?	?	1	0	1	0	0	0	0	?	?	?	?	?	?	?	?	1	?	1	1	0	1	?	1	0	0	0	0	0	1	?	0	-	-	-	-	-	0	0	1	0	0	-	-	-	0	-	-	-	-	-	-	-	-	-	-	0	-	-	-	-	1	0	?	-	0	1	1	?	?	?	?	-	?	?	?	?	0	?	?	?	0	-	-	-	-	-	-	-	-	0	?	0	0	1	0	-	0	1	?	?	?	?	?	?	?	0	?	?	?	?	0	?	1	0	?	3	-	0	?	?	?	?	?	?	?	?	?	?	?	?	?	?	?	?	-	-	-	-	-	-	-	0	-	-	-	1	0	1	0	0	0	0	0	0	0	1	1	1	1	0	0	?	?	-	?	1	0	2	0	-	-	?	?	1	?	0	0	0	?	?	?	?	0	-	0	-	-	-	-	-	-	-	-	0	1	-	-	-	-	0	0	0	0	0	0	0	0	-	-	6	?	1	-	?	?	?	?	?	?	?	?	?	-	-
Synaustrus	1	1	1	0	0	-	0	0	-	0	-	-	-	-	-	-	-	-	0	-	-	1	1	?	?	?	?	?	0	-	0	-	-	1	?	1	2	0	0	1	1	-	-	-	-	-	-	1	0	0	0	0	?	0	1	0	0	0	0	?	?	?	?	?	?	?	?	1	?	1	1	0	1	2	1	0	0	0	0	0	1	0	0	-	-	-	-	-	0	0	1	0	0	-	-	-	0	-	-	-	-	-	-	-	-	-	-	0	-	-	-	-	1	0	?	-	0	1	1	?	?	?	?	-	?	?	?	?	0	?	?	?	0	-	-	-	-	-	-	-	-	0	?	0	0	?	?	?	?	?	?	?	?	?	?	?	?	0	?	?	?	?	0	?	1	0	?	3	-	0	?	?	?	?	?	?	?	?	?	?	?	?	?	?	?	?	-	-	-	-	-	-	-	0	-	-	-	1	0	1	0	?	?	0	0	0	0	1	1	1	1	1	0	?	?	-	1	1	0	2	0	-	-	?	?	1	?	0	0	0	?	?	?	?	0	-	0	-	-	-	-	-	-	-	-	0	1	-	-	-	-	?	?	?	?	?	?	?	?	-	-	?	1	1	-	1	0	0	?	0	-	0	0	0	-	-
Schramixerxes	1	1	1	0	0	-	0	0	-	0	-	-	-	-	-	-	-	-	0	-	-	1	1	?	?	?	?	?	0	-	0	-	-	1	?	1	2	0	0	1	1	-	-	-	-	-	-	1	0	0	0	0	1	0	1	0	0	0	0	?	?	?	?	?	?	?	?	1	?	1	1	0	1	2	1	0	0	0	0	0	1	0	0	-	-	-	-	-	0	0	1	0	0	-	-	-	0	-	-	-	-	-	-	-	-	-	-	0	-	-	-	-	1	0	?	-	0	1	1	?	?	?	?	-	?	?	?	?	0	?	?	?	0	-	-	-	-	-	-	-	-	0	?	0	0	?	?	?	?	?	?	?	?	?	?	?	?	0	?	?	?	?	0	?	1	0	?	3	-	0	?	?	?	?	?	?	?	?	?	?	?	?	?	?	?	?	-	-	-	-	-	-	-	0	-	-	-	1	0	1	0	0	0	0	0	0	0	1	1	1	1	0	0	1	0	-	?	1	0	2	0	-	-	?	?	1	?	0	0	0	?	?	?	?	0	-	0	-	-	-	-	-	-	-	-	0	1	-	-	-	-	0	0	0	0	0	0	0	0	-	-	6	?	1	-	1	0	0	?	0	-	0	0	0	-	-
Heterocrania	1	1	1	0	0	-	0	0	-	0	-	-	-	-	-	-	-	-	0	-	-	1	1	?	?	?	?	?	0	-	0	-	-	1	?	1	2	0	0	1	1	-	-	-	-	-	-	?	?	?	?	?	1	?	?	0	0	0	0	?	?	?	?	?	?	?	?	1	0	1	1	0	1	?	?	?	?	?	?	?	?	?	0	-	-	-	-	-	0	0	1	0	0	-	-	-	0	-	-	-	-	-	-	-	-	-	-	0	-	-	-	-	1	0	?	-	0	1	1	?	?	?	?	-	?	?	?	?	0	?	?	?	0	-	-	-	-	-	-	-	-	0	?	0	0	1	0	-	0	?	?	1	1	1	1	?	?	0	?	?	?	?	0	1	1	0	?	3	-	0	?	?	?	?	?	?	?	?	?	?	?	?	?	?	?	?	-	-	-	-	-	-	-	0	-	-	-	1	0	1	0	?	?	0	0	0	0	1	1	1	1	1	0	?	?	-	1	1	0	2	0	-	-	?	?	1	1	0	0	0	1	0	?	?	0	-	0	-	-	-	-	-	-	-	-	0	1	-	-	-	-	0	0	0	0	0	1	0	0	-	-	6	1	1	-	1	0	0	?	0	-	0	0	0	-	-
Arthropleura	1	1	1	0	-	-	0	0	-	0	-	-	-	-	-	-	-	-	0	-	-	0	-	-	-	-	-	-	-	-	-	-	-	1	?	?	?	0	?	1	1	-	-	-	-	-	-	0	1	0	0	0	1	1	?	?	?	?	?	?	?	?	?	?	?	?	?	1	?	?	?	?	?	?	?	?	?	?	?	?	?	?	?	-	-	-	-	-	?	?	1	?	?	?	?	?	?	?	?	?	?	?	?	?	?	?	?	?	?	?	?	?	?	?	?	?	0	1	1	1	?	1	?	-	?	?	?	?	0	?	1	?	?	?	?	?	?	?	?	?	?	0	?	?	?	?	?	?	?	?	?	?	?	?	?	?	?	?	?	?	?	?	?	?	?	0	?	3	-	0	?	?	?	?	?	?	?	?	?	?	?	?	?	?	?	?	-	-	-	-	-	-	-	0	-	-	-	0	-	0	-	1	-	0	0	0	0	1	1	1	0	0	0	1	0	-	?	1	0	2	0	-	-	?	?	1	1	?	0	0	0	0	1	?	0	-	0	-	-	-	-	-	-	-	-	0	1	-	1	-	-	?	0	0	0	1	0	0	0	-	-	6	?	1	-	0	-	-	?	0	-	0	0	0	-	-
Pauropoda	1	1	1	0	-	-	0	0	-	0	-	-	-	-	-	-	-	-	0	-	-	0	-	-	-	-	-	-	-	-	-	-	-	1	2	0	-	0	-	1	1	-	-	-	-	-	-	0	1	0	0	0	1	1	0	0	0	0	0	0	1	1	?	?	?	?	?	1	0	1	1	0	1	0	1	0	0	1	0	0	1	0	0	1	-	-	-	-	0	0	1	1	0	-	0	-	1	1	0	-	-	-	-	-	-	1	0	0	-	-	-	-	-	0	1	-	0	1	1	1	1	1	1	-	-	-	-	-	0	0	1	-	0	-	-	-	-	-	-	-	-	0	0	0	0	1	0	-	0	0	0	1	1	1	1	0	-	1	0	-	1	0	0	1	1	0	0	3	-	0	0	-	-	0	-	-	-	-	-	-	-	1	1	1	?	1	-	-	-	-	-	-	-	0	-	-	-	0	-	0	-	0	2	0	0	0	0	1	1	0	0	-	-	-	-	-	0	1	1	0	0	-	-	0	0	1	1	0	0	0	0	0	1	0	0	-	0	-	-	-	-	-	-	-	-	0	1	-	1	-	-	0	0	0	0	0	0	0	0	-	-	6	1	1	-	0	-	-	0	0	-	0	0	0	-	-
Symphyla	1	1	1	1	-	-	0	0	-	0	-	-	-	-	-	-	-	-	0	-	-	0	-	-	-	-	-	-	-	-	-	-	-	1	2	0	-	0	-	1	1	-	-	-	-	-	-	0	1	0	0	0	1	1	0	0	0	0	0	0	1	1	?	?	?	?	?	1	0	1	1	0	1	0	1	0	0	1	1	0	1	0	0	1	-	-	-	-	0	0	1	0	0	-	-	-	0	-	-	-	-	-	-	-	-	-	-	0	-	-	-	-	1	0	1	-	0	1	1	1	1	1	1	-	-	-	-	-	0	0	1	-	0	-	-	-	-	-	-	-	-	0	0	0	0	1	0	-	1	0	0	1	1	1	1	1	0	0	0	0	0	0	0	1	1	0	0	3	-	0	0	-	-	0	-	-	-	-	-	-	-	1	1	1	?	1	-	-	-	-	-	-	-	0	-	-	-	0	-	0	-	0	1	0	0	0	0	1	2	0	0	-	-	-	-	-	1	1	1	0	0	-	-	0	0	1	1	0	0	0	0	0	1	0	0	-	0	-	-	-	-	-	-	-	-	0	1	-	1	-	-	0	0	0	0	0	0	0	0	-	-	6	1	1	-	0	-	-	0	1	3	0	0	0	-	-
Chilopoda	1	1	1	0	0	-	0	0	-	0	-	-	-	-	-	-	-	-	0	-	-	1	(12)	0	0	1	1	0	1	0	-	-	-	1	2	0	-	0	-	1	1	-	-	-	-	-	-	0	1	0	0	0	1	1	0	0	0	0	0	0	1	1	0	1	0	0	0	1	0	1	1	0	1	0	1	0	0	1	0	0	1	0	0	1	1	-	-	-	0	0	1	0	0	-	-	-	0	-	-	-	-	-	-	-	-	-	-	0	-	-	-	-	1	0	1	-	0	1	1	1	1	1	1	-	-	-	-	-	0	0	1	1	0	-	-	-	-	-	-	-	-	0	0	0	0	1	0	-	1	(04)	1	1	1	1	1	1	0	0	0	-	0	1	0	1	1	0	0	3	-	0	0	-	-	0	-	-	-	-	-	-	-	1	1	1	1	1	-	-	-	-	-	-	-	0	-	-	-	0	-	0	-	1	-	0	0	0	0	0	-	0	0	-	-	-	-	-	0	1	1	0	1	0	1	0	0	1	1	0	0	0	0	0	1	0	0	-	0	-	-	-	-	-	-	-	-	0	1	-	1	-	-	0	0	0	0	0	0	0	0	-	-	6	0	1	-	1	1	0	0	0	-	0	0	0	-	-
Diplopoda	1	1	1	1	0	-	0	0	-	0	-	-	-	-	-	-	-	-	0	-	-	1	2	0	0	1	1	0	1	0	-	-	-	1	2	0	-	0	-	1	1	-	-	-	-	-	-	0	1	0	0	0	1	1	0	0	0	0	0	0	1	1	0	?	?	0	0	1	0	1	1	0	1	0	1	0	0	1	0	0	1	0	0	1	-	-	-	-	0	0	1	0	0	-	-	-	0	-	-	-	-	-	-	-	-	-	-	0	-	-	-	-	0	0	1	-	0	1	1	1	1	1	1	-	-	-	-	-	0	0	1	-	0	-	-	-	-	-	-	-	-	0	0	0	0	1	0	-	1	0	1	1	1	1	1	0	-	1	0	-	1	0	0	1	1	0	0	3	-	0	0	-	-	0	-	-	-	-	-	-	-	1	1	1	1	1	-	-	-	-	-	-	-	0	-	-	-	0	-	0	-	1	-	0	0	0	0	1	1	0	0	-	-	-	-	-	0	1	1	0	0	-	-	0	0	1	1	0	0	0	0	0	1	0	0	-	0	-	-	-	-	-	-	-	-	0	1	-	1	-	-	0	0	0	0	0	0	0	0	-	-	6	1	1	-	0	-	-	0	0	-	0	0	0	-	-
Ostracoda	1	1	1	1	-	-	0	0	-	0	-	-	-	-	-	-	-	-	1	-	-	0	-	-	-	-	-	-	-	-	-	-	-	1	2	0	-	0	-	1	0	0	1	4	1	0	0	-	-	-	-	-	1	-	0	0	-	-	-	0	1	?	?	?	?	?	?	1	0	1	0	1	-	-	1	0	0	-	0	0	1	1	0	-	-	-	-	-	0	0	1	0	0	-	-	-	0	-	-	-	-	-	-	-	-	-	-	0	-	-	-	-	0	0	1	-	0	1	1	1	1	1	0	-	2	3	-	0	0	0	1	1	1	1	0	-	1	0	0	1	0	0	0	0	0	1	1	0	0	?	0	0	-	0	1	(01)	-	0	0	1	0	0	0	1	0	0	0	3	-	0	1	0	0	0	-	-	-	-	-	-	-	?	1	1	?	0	-	-	-	-	-	-	-	1	1	1	0	0	-	1	0	0	1	0	-	0	0	0	-	0	1	-	-	-	-	-	0	1	1	1	0	-	-	0	0	1	1	0	0	1	0	0	0	-	0	-	1	1	0	0	-	-	-	(23)	0	0	0	0	-	0	0	0	0	0	0	0	0	1	0	-	-	?	0	1	-	0	-	-	0	1	1	0	0	0	-	-
Argulus	1	1	1	0	0	-	0	0	-	0	-	-	-	-	-	-	-	-	0	-	-	1	1	?	1	?	0	0	1	0	-	-	-	1	2	?	?	0	?	1	1	-	-	-	-	-	-	1	-	1	0	0	0	-	0	0	0	0	0	0	1	1	?	?	?	?	?	1	0	1	1	0	0	-	1	0	0	-	?	0	1	?	0	-	-	-	-	-	0	0	1	1	0	-	-	-	?	-	-	-	-	-	-	-	-	-	0	0	-	-	-	-	-	0	1	-	0	1	1	1	1	1	1	-	-	-	-	-	0	0	1	1	1	1	0	-	0	0	0	1	-	0	1	0	0	1	0	-	0	?	0	0	-	0	1	0	-	0	0	-	0	1	?	0	0	0	1	3	-	0	1	0	0	1	0	-	-	-	1	1	0	?	1	1	?	0	-	-	-	-	-	-	-	1	0	1	1	1	1	1	0	0	4	0	0	0	0	0	-	0	0	-	-	-	-	-	0	1	0	0	0	-	-	0	0	1	1	0	0	0	1	0	0	-	0	-	1	1	0	0	-	-	-	-	-	0	0	0	-	1	0	0	0	0	0	0	0	1	0	-	-	-	0	1	-	0	-	-	0	?	?	0	?	0	-	-
Artemia	1	1	1	0	0	-	0	0	-	0	-	-	-	-	-	-	-	-	1	1	0	1	1	1	1	1	0	0	0	-	1	?	1	1	2	0	-	0	-	1	1	-	-	-	-	-	-	0	1	0	0	0	1	1	0	0	0	0	0	0	1	0	1	1	0	0	0	1	0	1	1	0	0	-	1	0	0	-	0	0	1	0	0	-	-	-	-	-	0	0	0	-	0	-	-	-	-	-	-	-	-	-	-	-	-	-	-	0	-	-	-	-	-	0	1	-	0	1	1	1	1	1	1	-	-	-	-	-	0	0	1	-	1	1	0	-	?	0	0	1	-	0	1	0	0	1	0	-	0	1	0	0	-	0	1	0	-	0	0	1	1	0	0	1	0	0	1	3	-	0	0	-	-	1	0	-	-	-	1	1	1	1	1	1	?	0	-	-	-	-	-	-	-	0	-	-	-	1	0	1	0	1	-	0	0	0	0	0	-	0	1	-	-	-	-	-	0	1	0	-	0	-	-	0	0	1	1	0	1	1	0	0	0	-	0	-	1	1	0	0	-	-	-	3	-	0	0	1	-	0	0	1	0	0	0	0	0	1	0	-	-	-	0	1	-	0	-	-	0	1	3	0	0	0	-	-
Triops	1	1	1	1	0	-	0	0	-	0	-	-	-	-	-	-	-	-	1	2	0	1	1	1	1	1	0	0	1	0	-	-	-	1	2	0	-	0	-	1	0	0	0	-	-	1	1	-	0	-	-	-	1	-	0	0	-	-	-	0	1	0	1	1	0	0	0	1	0	1	1	0	1	2	1	0	0	-	0	0	1	0	0	0	(01)	-	-	-	0	0	0	-	0	-	-	-	-	-	-	-	-	-	-	-	-	-	-	0	-	-	-	-	-	0	1	-	0	1	1	1	1	1	1	-	-	-	-	-	0	0	1	-	1	1	0	-	0	0	0	1	-	0	1	0	0	1	0	-	0	2	0	0	-	0	1	0	-	0	0	1	1	0	0	1	1	0	1	3	-	0	0	-	-	1	0	-	-	-	1	1	1	1	1	1	0	0	-	-	-	-	-	-	-	0	-	-	-	1	0	1	0	1	-	0	-	0	0	1	1	0	1	-	-	-	-	-	0	1	0	-	1	1	(01)	0	0	1	1	0	1	1	0	0	0	-	0	-	1	1	0	0	-	-	-	3	-	0	0	1	-	0	0	1	0	0	0	0	0	1	0	-	-	-	0	1	-	0	-	-	0	1	1	0	0	0	-	-
Copepoda	1	1	1	0	0	-	0	0	-	0	-	-	-	-	-	-	-	-	0	-	-	1	1	-	-	-	-	-	-	-	-	-	-	1	2	?	?	0	?	1	1	-	-	-	-	-	-	1	1	0	0	0	0	-	0	0	0	0	0	0	1	1	?	?	?	?	?	1	0	1	1	0	0	-	1	0	0	-	0	0	?	?	0	0	1	-	-	-	0	0	1	0	0	-	-	-	0	-	-	-	-	-	-	-	-	-	-	0	-	-	-	-	0	0	1	-	0	1	1	1	1	1	0	-	2	-	1	0	0	0	1	0	1	1	0	-	1	0	0	1	1	0	1	0	0	1	1	0	0	3	0	0	-	0	1	1	-	0	0	1	0	1	0	1	1	0	1	3	-	0	1	0	0	0	-	-	-	-	-	-	-	?	1	1	?	0	-	-	-	-	-	-	-	0	-	-	-	1	1	1	0	0	3	0	0	0	0	0	-	0	1	-	-	-	-	-	0	1	0	1	1	1	1	0	0	1	1	0	0	0	1	1	0	-	1	1	1	1	0	0	-	-	-	2	2	0	0	1	-	1	0	0	0	0	0	0	0	1	0	-	-	-	0	1	-	0	-	-	0	1	3	0	0	0	-	-
Lepidocaris	1	1	1	0	-	-	0	0	-	0	-	-	-	-	-	-	-	-	?	?	?	0	-	-	-	?	?	?	0	-	-	-	-	1	2	0	-	0	-	1	1	-	-	-	-	-	-	0	1	0	0	0	1	1	0	0	0	0	0	?	?	?	?	?	?	?	?	1	?	1	1	?	0	-	1	0	0	-	0	0	?	?	0	0	1	-	-	-	0	0	1	1	0	-	-	-	0	-	-	-	-	-	-	-	-	-	0	0	-	-	-	-	-	0	1	-	0	1	1	1	1	1	?	-	?	?	?	?	0	?	1	0	1	1	0	-	1	0	0	1	0	0	0	0	0	1	0	-	0	1	0	?	?	?	?	0	-	0	0	?	?	0	0	1	1	0	1	3	-	0	?	?	?	?	?	?	?	?	?	?	?	?	?	?	?	0	-	-	-	-	-	-	-	0	-	-	-	0	-	1	0	1	-	0	0	0	0	0	-	1	1	1	0	?	?	-	?	1	0	-	1	0	1	?	?	1	1	0	1	1	1	0	0	-	0	-	1	1	0	0	-	-	-	2	0	0	0	1	-	1	?	?	0	0	1	0	0	1	0	-	-	-	0	1	-	0	-	-	0	1	3	1	0	0	-	-
Cephalocarida	1	1	1	0	-	-	0	0	-	0	-	-	-	-	-	-	-	-	0	-	-	0	-	-	-	-	-	-	-	-	-	-	-	1	2	0	-	0	-	1	1	-	-	-	-	-	-	1	0	0	0	0	0	-	0	0	0	0	0	0	1	0	?	?	1	?	0	1	0	1	1	0	0	-	1	1	0	-	0	0	1	1	0	-	-	-	-	-	0	0	1	0	0	-	-	-	0	-	-	-	-	-	-	-	-	-	-	0	-	-	-	-	0	0	1	-	0	1	1	1	0	0	0	-	2	3	-	0	0	0	0	0	1	1	0	-	1	1	0	1	1	0	1	0	0	1	0	-	0	0	0	0	-	0	1	1	-	0	0	-	0	1	0	1	1	0	1	3	-	0	0	-	-	0	-	-	-	-	-	-	-	?	1	1	?	0	-	-	-	-	-	-	-	0	-	-	-	1	2	1	0	1	-	0	0	0	0	0	-	1	1	1	1	0	-	-	0	1	0	0	0	-	-	0	0	1	?	0	1	?	0	0	0	-	0	-	1	1	0	0	-	-	-	2	1	0	0	0	-	0	0	1	0	0	1	0	0	1	0	-	-	2	0	1	-	0	-	-	0	1	3	0	0	0	-	-
Remipedia	1	1	1	0	-	-	0	0	-	0	-	-	-	-	-	-	-	-	0	-	-	0	-	-	-	-	-	-	-	-	-	-	-	1	2	?	?	0	?	1	1	-	-	-	-	-	-	1	1	0	0	0	1	1	0	0	0	0	0	0	1	0	1	?	1	1	?	1	0	1	1	0	1	2	1	1	0	-	0	0	1	0	0	0	1	-	-	-	1	0	1	0	0	-	0	-	1	1	-	-	-	-	-	-	-	0	-	0	-	-	-	-	1	0	0	0	0	0	1	0	1	0	1	-	-	-	-	-	0	0	1	1	1	1	0	-	1	0	0	1	2	0	1	0	0	1	0	-	0	0	0	0	-	0	1	1	-	0	0	-	0	1	0	1	1	0	1	3	-	0	0	-	-	1	1	(02)	0	0	0	-	-	?	1	1	?	0	-	-	-	-	-	-	-	0	-	-	-	0	-	0	-	1	-	0	0	0	0	0	-	1	0	0	0	0	-	-	0	1	1	0	1	(01)	1	0	0	1	1	0	1	0	0	0	0	-	0	-	1	1	0	0	-	-	-	2	2	0	1	0	1	1	0	0	0	0	0	0	0	1	0	-	-	(356)	0	1	-	0	-	-	0	1	2	0	0	0	-	-
Nahecaris	1	1	1	0	0	-	0	0	-	0	-	-	-	-	-	-	-	-	0	-	-	1	1	?	?	?	?	?	0	-	1	0	1	1	?	?	?	0	?	1	0	0	1	0	0	1	1	-	-	-	-	-	1	-	0	0	-	-	-	?	?	?	?	?	?	?	?	1	?	1	1	0	0	-	1	0	0	-	0	?	?	?	?	-	-	-	-	-	0	0	1	1	0	-	0	-	1	0	0	-	-	-	-	-	-	1	0	0	-	-	-	-	-	0	?	?	0	1	1	?	?	?	?	-	?	?	?	?	0	?	?	1	1	1	0	-	1	0	1	?	1	0	?	0	0	1	?	0	0	0	0	?	?	?	?	?	?	0	?	?	?	?	0	1	1	0	?	3	-	0	?	?	?	?	?	?	?	?	?	?	?	?	?	?	?	0	-	-	-	-	-	-	-	0	-	-	-	1	2	0	-	0	0	0	-	0	0	0	-	0	1	-	-	-	-	-	?	1	1	?	0	-	-	0	0	1	?	?	?	?	?	?	?	?	0	-	1	1	0	0	-	-	-	2	?	0	0	?	0	1	0	?	0	0	0	0	0	?	0	-	-	?	?	1	-	1	0	0	0	1	0	0	0	0	-	-
Cinerocaris	1	1	1	0	0	-	0	0	-	0	-	-	-	-	-	-	-	-	0	-	-	1	1	?	?	?	?	?	0	-	1	0	1	1	2	?	?	0	?	1	0	0	1	0	0	1	0	-	-	-	-	-	1	-	?	0	-	-	-	?	?	?	?	?	?	?	?	1	?	1	1	0	0	-	1	0	0	-	0	?	?	?	?	-	-	-	-	-	0	0	1	1	0	-	0	-	1	0	0	-	-	-	-	-	-	1	0	0	-	-	-	-	-	0	1	-	0	?	1	1	1	1	1	-	-	-	-	-	0	0	1	1	1	1	0	-	1	0	?	?	1	0	1	0	0	1	1	0	?	?	0	?	?	?	?	1	1	0	0	-	0	0	0	1	1	0	?	3	-	0	?	?	?	?	?	?	?	?	?	?	?	?	?	?	?	0	-	-	-	-	-	-	-	0	-	-	-	1	2	0	-	0	0	0	-	0	0	0	-	0	1	-	-	-	-	-	?	1	?	?	0	-	-	0	0	1	?	?	1	?	?	?	?	?	0	-	1	1	0	0	-	-	-	2	?	0	1	?	0	1	0	1	0	0	1	0	0	?	0	-	-	?	?	1	-	1	0	0	?	1	0	0	0	0	-	-
Isopoda	1	1	1	1	0	-	0	0	-	0	-	-	-	-	-	-	-	-	0	-	-	1	1	1	1	3	0	0	1	0	-	0	-	1	2	1	0	0	0	1	1	-	-	-	-	-	-	0	0	0	0	0	1	1	0	0	0	0	0	0	1	1	1	1	1	1	1	1	0	1	1	0	1	1	1	0	0	-	0	0	?	?	0	0	1	-	-	-	0	0	1	0	0	-	-	-	0	-	-	-	-	-	-	-	-	-	-	0	-	-	-	-	0	0	1	-	0	1	1	1	1	1	1	-	-	-	-	-	0	0	1	-	1	1	0	-	0	0	0	1	-	0	1	0	0	1	(01)	0	0	0	0	0	-	0	1	1	0	0	0	1	0	0	0	1	1	0	1	3	-	0	0	-	-	1	0	-	-	-	1	?	0	1	1	1	0	0	-	-	-	-	-	-	-	1	0	0	?	1	2	0	-	0	1	0	0	0	0	0	-	1	0	0	0	0	-	-	0	1	1	0	1	1	1	0	0	1	1	0	0	0	0	?	1	1	0	-	1	1	0	0	-	-	-	-	-	0	1	0	-	-	-	0	0	0	0	0	0	1	0	-	-	(56)	0	1	-	0	-	-	0	1	-	0	0	1	-	-
Euphausiacea	1	1	1	1	0	-	0	0	-	0	-	-	-	-	-	-	-	-	1	1	0	1	1	1	1	2	0	0	0	-	1	0	1	1	2	1	1	0	0	1	0	1	-	-	-	-	-	-	0	0	0	1	1	-	0	0	-	-	-	0	1	1	?	?	?	?	?	1	0	1	1	0	1	2	1	0	0	-	0	0	1	0	0	-	-	-	-	-	0	0	1	1	0	-	0	-	1	0	0	-	-	-	-	-	-	1	0	0	-	-	-	-	-	0	1	-	0	1	1	1	1	1	1	-	-	-	-	-	0	0	1	-	1	1	0	-	1	0	0	1	2	0	1	0	0	1	(01)	0	0	0	0	0	-	0	1	1	0	0	0	1	0	0	0	1	1	0	1	3	-	0	1	1	1	1	0	-	-	-	1	1	1	?	1	1	?	0	-	-	-	-	-	-	-	0	-	-	-	1	2	0	-	0	1	0	-	0	0	0	-	1	0	1	0	0	-	-	0	1	1	1	0	-	-	0	0	1	1	0	1	1	1	1	1	1	0	-	1	1	0	0	-	-	-	2	0	0	1	1	0	1	0	1	0	0	0	0	0	1	0	-	-	5	0	1	-	1	0	0	0	0	-	0	1	1	-	-
Anaspidacea	1	1	1	1	0	-	0	0	-	0	-	-	-	-	-	-	-	-	0	-	-	1	1	1	1	2	0	0	0	-	1	0	1	1	2	?	?	0	?	1	1	-	-	-	-	-	-	0	1	0	0	0	1	1	0	0	0	0	0	0	1	1	1	?	?	?	0	1	0	1	1	0	1	2	1	0	0	-	0	0	?	?	0	0	1	-	-	-	0	0	1	1	0	-	0	-	1	0	0	-	-	-	-	-	-	1	0	0	-	-	-	-	-	0	1	-	0	1	1	1	1	1	1	-	-	-	-	-	0	0	1	-	1	1	0	-	1	0	1	1	2	0	1	0	0	1	1	0	0	0	0	0	-	0	1	1	0	0	0	1	0	0	0	1	1	0	1	3	-	0	1	1	1	1	0	-	-	-	1	1	1	?	1	1	?	0	-	-	-	-	-	-	-	0	-	-	-	1	2	0	-	0	1	0	0	0	0	0	-	0	1	-	-	-	-	-	0	1	1	1	1	(01)	1	0	0	1	1	0	(01)	0	1	0	1	1	0	-	1	1	0	0	-	-	-	1	-	0	1	1	-	0	1	1	0	0	0	0	0	1	0	-	-	(56)	0	1	-	1	1	0	0	0	-	0	0	1	-	-
Stomatopoda	1	1	1	1	0	-	0	0	-	0	-	-	-	-	-	-	-	-	1	1	0	1	1	1	1	2	0	0	0	-	1	0	1	1	2	1	0	0	0	1	1	-	-	-	-	-	-	1	0	0	1	1	1	0	1	1	0	0	0	0	1	1	1	1	1	?	0	1	0	1	1	0	1	2	1	0	0	-	0	0	1	?	0	0	0	-	-	-	0	0	1	1	0	-	0	-	1	0	0	-	-	-	-	-	-	1	0	0	-	-	-	-	-	0	1	-	0	1	1	1	1	1	1	-	-	-	-	-	0	0	1	-	1	1	0	-	1	0	1	1	2	0	1	0	0	1	1	0	0	0	0	0	-	0	1	1	0	0	0	1	0	0	0	1	1	0	1	3	-	0	1	1	1	1	1	2	0	0	1	1	1	1	1	1	?	0	-	-	-	-	-	-	-	0	-	-	-	1	2	0	-	0	1	0	0	0	0	0	-	1	0	1	0	0	-	-	0	1	1	0	1	1	0	0	0	1	1	0	0	0	1	1	1	1	0	-	1	1	0	0	-	-	-	2	?	0	1	1	0	0	0	1	0	0	0	0	0	1	0	-	-	(56)	0	1	-	1	1	0	0	0	-	0	0	1	-	-
Leptostraca	1	1	1	0	0	-	0	0	-	0	-	-	-	-	-	-	-	-	0	-	-	1	1	1	1	1	0	0	0	-	1	0	1	1	2	?	?	0	?	1	0	0	1	1	0	1	1	-	-	-	-	-	1	-	0	1	-	-	-	0	1	1	1	1	1	?	0	1	0	1	1	0	1	2	1	0	0	-	0	0	1	1	0	-	-	-	-	-	0	0	1	1	0	-	0	-	1	0	0	-	-	-	-	-	-	0	0	0	-	-	-	-	-	0	1	-	0	1	1	1	1	1	1	-	-	-	-	-	0	0	1	-	1	1	0	-	0	0	0	1	-	0	1	0	0	1	1	0	0	0	0	0	-	0	1	1	0	0	0	1	0	1	0	1	1	0	1	3	-	0	1	1	0	1	0	-	-	-	1	0	0	?	1	1	?	0	-	-	-	-	-	-	-	0	-	-	-	1	2	0	-	0	0	0	-	0	0	0	-	0	1	-	-	-	-	-	0	1	0	-	0	-	-	0	0	1	1	0	1	1	0	?	1	1	0	-	1	1	0	0	-	-	-	3	-	0	0	1	0	1	0	1	0	0	0	0	0	1	0	-	-	5	0	1	-	0	-	-	0	1	3	0	0	0	-	-
Collembola	1	1	1	0	0	0	0	0	-	0	-	-	-	-	-	-	-	-	0	-	-	1	1	1	1	1	0	0	1	0	-	-	-	1	2	0	-	0	-	1	1	-	-	-	-	-	-	0	1	0	0	0	1	1	0	0	0	0	0	0	1	0	?	?	?	?	?	1	0	1	1	0	1	2	1	0	0	-	1	0	1	0	0	-	-	0	-	-	0	0	1	0	0	-	-	-	0	-	-	-	-	-	-	-	-	-	-	0	-	-	-	-	(01)	0	1	-	0	1	1	1	1	1	1	-	-	-	-	-	0	0	1	-	0	-	-	-	-	-	-	-	-	0	0	0	0	1	0	-	0	3	0	1	0	1	1	1	0	0	0	0	0	1	1	1	1	0	0	3	-	0	0	-	-	0	-	-	-	-	-	-	-	1	1	1	?	0	-	-	-	-	-	-	-	1	1	1	0	1	3	1	0	0	(24)	0	0	0	0	0	-	(01)	0	0	0	0	-	0	0	1	1	0	0	-	-	0	0	1	1	0	0	0	0	0	1	0	0	-	0	-	-	-	-	-	-	-	-	0	1	0	-	0	-	0	0	0	0	0	0	0	0	-	-	4	1	1	-	0	-	-	0	1	-	0	0	0	-	-
Zygentoma	1	1	1	0	0	0	0	0	-	0	-	-	-	-	-	-	-	-	1	1	0	1	1	1	1	1	0	0	1	0	-	-	-	1	2	0	-	0	-	1	1	-	-	-	-	-	-	0	1	0	0	0	1	1	0	0	0	0	0	0	1	0	1	1	1	1	0	1	0	1	1	0	1	2	1	0	0	-	1	0	1	0	0	-	-	0	-	-	0	0	1	0	0	-	-	-	0	-	-	-	-	-	-	-	-	-	-	0	-	-	-	-	1	0	1	-	0	1	1	1	1	1	1	-	-	-	-	-	0	0	1	1	0	-	-	-	-	-	-	-	-	0	0	0	0	1	0	-	0	0	0	1	0	1	1	1	1	0	0	0	0	1	0	1	1	0	0	3	-	0	1	0	0	1	0	-	-	-	1	0	0	1	1	1	0	0	-	-	-	-	-	-	-	0	-	-	-	1	3	1	0	0	1	0	0	0	0	0	-	0	1	-	-	-	-	0	0	1	1	0	0	-	-	0	0	1	1	0	0	0	0	0	1	0	0	-	0	-	-	-	-	-	-	-	-	0	1	0	-	0	-	0	0	0	0	0	0	0	0	-	-	4	1	1	-	1	0	1	0	1	1	0	0	0	-	-
Odonata	1	1	1	0	0	0	0	0	-	0	-	-	-	-	-	-	-	-	1	1	0	1	1	1	1	3	0	0	1	0	-	-	-	1	2	0	-	0	-	1	1	-	-	-	-	-	-	0	1	0	0	0	1	1	0	0	0	0	0	0	1	1	1	1	1	1	?	1	0	1	1	0	1	1	1	0	0	-	1	0	1	0	0	-	-	0	-	-	0	0	1	0	0	-	-	-	0	-	-	-	-	-	-	-	-	-	-	0	-	-	-	-	1	0	1	-	0	1	1	1	1	1	1	-	-	-	-	-	0	0	1	-	0	-	-	-	-	-	-	-	-	0	0	0	0	1	0	-	0	0	0	1	0	1	0	1	1	0	0	0	0	1	0	1	1	0	1	3	-	0	1	0	1	0	-	-	-	-	-	-	-	1	1	1	?	1	-	-	-	-	-	-	-	1	0	2	-	1	3	1	0	0	1	0	0	0	0	0	-	0	1	-	-	-	-	0	0	1	1	0	0	-	-	0	0	1	1	0	0	0	0	0	1	0	0	-	0	-	-	-	-	-	-	-	-	0	1	0	-	0	-	0	0	0	0	0	0	0	0	-	-	4	1	1	-	0	-	-	0	0	-	0	0	0	-	-
Coleoptera	1	1	1	0	0	1	0	0	-	0	-	-	-	-	-	-	-	-	0	-	-	1	1	1	1	3	0	0	1	0	-	-	-	1	2	0	-	0	-	1	1	-	-	-	-	-	-	0	1	0	0	0	1	1	0	0	0	0	0	0	1	1	1	1	1	1	1	1	0	1	1	0	1	(12)	1	0	0	-	1	0	1	0	0	-	-	0	-	-	0	0	1	0	0	-	-	-	0	-	-	-	-	-	-	-	-	-	-	0	-	-	-	-	1	0	1	-	0	1	1	1	1	1	1	-	-	-	-	-	0	0	1	-	0	-	-	-	-	-	-	-	-	0	0	0	0	1	0	-	0	0	0	1	0	1	0	1	1	0	0	0	0	1	0	1	1	0	1	3	-	0	1	0	1	0	-	-	-	-	-	-	-	1	1	1	0	1	-	-	-	-	-	-	-	1	0	2	-	1	3	1	0	0	1	0	0	0	0	0	-	0	0	-	-	-	-	1	0	1	1	0	0	-	-	0	0	1	1	0	0	0	0	0	1	0	0	-	0	-	-	-	-	-	-	-	-	0	1	0	-	0	-	0	0	0	0	0	0	0	0	-	-	4	1	1	-	0	-	-	0	0	-	0	0	0	-	-
Diptera	1	1	1	0	0	1	0	0	-	0	-	-	-	-	-	-	-	-	1	1	0	1	1	1	1	3	0	0	1	0	-	-	-	1	2	0	-	0	-	1	1	-	-	-	-	-	-	0	1	0	0	0	1	1	0	0	0	0	0	0	1	1	1	1	1	1	1	1	0	1	1	0	1	(12)	1	0	0	-	1	0	1	0	0	-	-	1	-	-	0	0	1	1	0	-	-	-	0	-	-	-	-	-	-	-	-	-	0	0	-	-	-	-	-	0	1	-	0	1	1	1	1	1	1	-	-	-	-	-	0	0	1	-	0	-	-	-	-	-	-	-	-	0	0	0	0	1	0	-	0	0	0	1	0	1	0	1	1	0	0	0	0	1	0	1	1	0	1	3	-	0	1	0	1	0	-	-	-	-	-	-	-	1	1	1	0	1	-	-	-	-	-	-	-	1	0	2	-	1	3	1	0	0	1	0	0	0	0	0	-	0	0	-	-	-	-	1	0	1	1	0	0	-	-	0	0	1	1	0	0	0	0	0	1	0	0	-	0	-	-	-	-	-	-	-	-	0	1	0	-	0	-	0	0	0	0	0	0	0	0	-	-	4	1	1	-	0	-	-	0	0	-	0	0	0	-	-
Hymenoptera	1	1	1	0	0	1	0	0	-	0	-	-	-	-	-	-	-	-	1	1	0	1	1	1	1	3	0	0	1	0	-	-	-	1	2	0	-	0	-	1	1	-	-	-	-	-	-	0	1	0	0	0	1	1	0	0	0	0	0	0	1	1	1	1	1	1	1	1	0	1	1	0	1	(12)	1	0	0	-	1	0	1	0	0	-	-	1	-	-	0	0	1	0	0	-	-	-	0	-	-	-	-	-	-	-	-	-	-	0	-	-	-	-	1	0	1	-	0	1	1	1	1	1	1	-	-	-	-	-	0	0	1	1	0	-	-	-	-	-	-	-	-	0	0	0	0	1	0	-	0	0	0	1	0	1	0	1	1	0	0	0	0	1	0	1	1	0	1	3	-	0	1	0	1	1	0	-	-	-	1	1	0	?	1	1	?	1	-	-	-	-	-	-	-	1	0	2	-	1	3	1	0	0	1	0	0	0	0	0	-	0	0	-	-	-	-	1	0	1	1	0	0	-	-	0	0	1	1	0	0	0	0	0	1	0	0	-	0	-	-	-	-	-	-	-	-	0	1	0	-	0	-	0	0	0	0	0	0	0	0	-	-	4	1	1	-	0	-	-	0	0	-	0	0	0	-	-
;
end;

BEGIN MRBAYES;

SET autoclose=yes nowarn=yes;

LOG START filename=Main011220.output;

OUTGROUP Priapulida;

LSET rates=gamma  coding=variable; 

CONSTRAINT Root = 3-.;
CONSTRAINT Aparaglossata PARTIAL = 	Coleoptera Diptera : Priapulida Nematoda Tardigrada Onychophora Pycnogonida Limulus Scorpiones Pseudoscorpiones Opiliones Palpigradi Solifugae Ricinulei Thelyphonida Schizomida Amblypygi Araneae Acari Chilopoda Diplopoda Pauropoda Symphyla Argulus Ostracoda Triops Artemia Copepoda Leptostraca Stomatopoda Isopoda Euphausiacea Cephalocarida Remipedia Collembola Zygentoma Odonata Hymenoptera ;
CONSTRAINT Neoptera PARTIAL =   	Coleoptera Diptera Hymenoptera : Priapulida Nematoda Tardigrada Onychophora Pycnogonida Limulus Scorpiones Pseudoscorpiones Opiliones Palpigradi Solifugae Ricinulei Thelyphonida Schizomida Amblypygi Araneae Acari Chilopoda Diplopoda Pauropoda Symphyla Argulus Ostracoda Triops Artemia Copepoda Leptostraca Stomatopoda Isopoda Euphausiacea Cephalocarida Remipedia Collembola Zygentoma Odonata ;
CONSTRAINT Pterygota PARTIAL =   	Odonata Coleoptera Diptera Hymenoptera : Priapulida Nematoda Tardigrada Onychophora Pycnogonida Limulus Scorpiones Pseudoscorpiones Opiliones Palpigradi Solifugae Ricinulei Thelyphonida Schizomida Amblypygi Araneae Acari Chilopoda Diplopoda Pauropoda Symphyla Argulus Ostracoda Triops Artemia Copepoda Leptostraca Stomatopoda Isopoda Euphausiacea Cephalocarida Remipedia Collembola Zygentoma ;
CONSTRAINT Insecta PARTIAL =   		Zygentoma Odonata Coleoptera Diptera Hymenoptera : Priapulida Nematoda Tardigrada Onychophora Pycnogonida Limulus Scorpiones Pseudoscorpiones Opiliones Palpigradi Solifugae Ricinulei Thelyphonida Schizomida Amblypygi Araneae Acari Chilopoda Diplopoda Pauropoda Symphyla Argulus Ostracoda Triops Artemia Copepoda Leptostraca Stomatopoda Isopoda Euphausiacea Cephalocarida Remipedia Collembola ;
CONSTRAINT Hexapoda PARTIAL =  		Collembola Zygentoma Odonata Coleoptera Diptera Hymenoptera : Priapulida Nematoda Tardigrada Onychophora Pycnogonida Limulus Scorpiones Pseudoscorpiones Opiliones Palpigradi Solifugae Ricinulei Thelyphonida Schizomida Amblypygi Araneae Acari Chilopoda Diplopoda Pauropoda Symphyla Argulus Ostracoda Triops Artemia Copepoda Leptostraca Stomatopoda Isopoda Euphausiacea Cephalocarida Remipedia ;
CONSTRAINT Multicrustacea PARTIAL =	Copepoda Leptostraca Stomatopoda Isopoda Euphausiacea : Priapulida Nematoda Tardigrada Onychophora Pycnogonida Limulus Scorpiones Pseudoscorpiones Opiliones Palpigradi Solifugae Ricinulei Thelyphonida Schizomida Amblypygi Araneae Acari Chilopoda Diplopoda Pauropoda Symphyla Argulus Ostracoda Triops Artemia Cephalocarida Remipedia Collembola Zygentoma Odonata Coleoptera Diptera Hymenoptera ;
CONSTRAINT Altocrustacea PARTIAL =	Triops Artemia Copepoda Leptostraca Stomatopoda Isopoda Euphausiacea Cephalocarida Remipedia Collembola Zygentoma Odonata Coleoptera Diptera Hymenoptera : Priapulida Nematoda Tardigrada Onychophora Pycnogonida Limulus Scorpiones Pseudoscorpiones Opiliones Palpigradi Solifugae Ricinulei Thelyphonida Schizomida Amblypygi Araneae Acari Chilopoda Diplopoda Pauropoda Symphyla Argulus Ostracoda ;
CONSTRAINT Pancrustacea PARTIAL =   Argulus Ostracoda Triops Artemia Copepoda Leptostraca Stomatopoda Isopoda Euphausiacea Cephalocarida Remipedia Collembola Zygentoma Odonata Coleoptera Diptera Hymenoptera : Priapulida Nematoda Tardigrada Onychophora Pycnogonida Limulus Scorpiones Pseudoscorpiones Opiliones Palpigradi Solifugae Ricinulei Thelyphonida Schizomida Amblypygi Araneae Acari Chilopoda Diplopoda Pauropoda Symphyla ;
CONSTRAINT Oligostraca PARTIAL =  	Argulus Ostracoda : Triops Artemia Copepoda Leptostraca Stomatopoda Isopoda Euphausiacea Cephalocarida Remipedia Collembola Zygentoma Odonata Coleoptera Diptera Hymenoptera Priapulida Nematoda Tardigrada Onychophora Pycnogonida Limulus Scorpiones Pseudoscorpiones Opiliones Palpigradi Solifugae Ricinulei Thelyphonida Schizomida Amblypygi Araneae Acari Chilopoda Diplopoda Pauropoda Symphyla ;
CONSTRAINT Dignatha PARTIAL =  		Diplopoda Pauropoda : Priapulida Nematoda Tardigrada Onychophora Pycnogonida Limulus Scorpiones Pseudoscorpiones Opiliones Palpigradi Solifugae Ricinulei Thelyphonida Schizomida Amblypygi Araneae Acari Chilopoda Symphyla Argulus Ostracoda Triops Artemia Copepoda Leptostraca Stomatopoda Isopoda Euphausiacea Cephalocarida Remipedia Collembola Zygentoma Odonata Coleoptera Diptera Hymenoptera ;
CONSTRAINT Progoneata PARTIAL =  	Diplopoda Pauropoda Symphyla : Priapulida Nematoda Tardigrada Onychophora Pycnogonida Limulus Scorpiones Pseudoscorpiones Opiliones Palpigradi Solifugae Ricinulei Thelyphonida Schizomida Amblypygi Araneae Acari Chilopoda Argulus Ostracoda Triops Artemia Copepoda Leptostraca Stomatopoda Isopoda Euphausiacea Cephalocarida Remipedia Collembola Zygentoma Odonata Coleoptera Diptera Hymenoptera ;
CONSTRAINT Mandibulata PARTIAL =  	Chilopoda Diplopoda Pauropoda Symphyla Argulus Ostracoda Triops Artemia Copepoda Leptostraca Stomatopoda Isopoda Euphausiacea Cephalocarida Remipedia Collembola Zygentoma Odonata Coleoptera Diptera Hymenoptera : Priapulida Nematoda Tardigrada Onychophora Pycnogonida Limulus Scorpiones Pseudoscorpiones Opiliones Palpigradi Solifugae Ricinulei Thelyphonida Schizomida Amblypygi Araneae Acari ;
CONSTRAINT Pedipalpi PARTIAL =  	Thelyphonida Schizomida Amblypygi : Priapulida Nematoda Tardigrada Onychophora Pycnogonida Limulus Scorpiones Pseudoscorpiones Opiliones Palpigradi Solifugae Ricinulei Araneae Acari Chilopoda Diplopoda Pauropoda Symphyla Argulus Ostracoda Triops Artemia Copepoda Leptostraca Stomatopoda Isopoda Euphausiacea Cephalocarida Remipedia Collembola Zygentoma Odonata Coleoptera Diptera Hymenoptera ;
CONSTRAINT Arachnida PARTIAL = 		Scorpiones Pseudoscorpiones Opiliones Palpigradi Solifugae Ricinulei Thelyphonida Schizomida Amblypygi Araneae Acari : Priapulida Nematoda Tardigrada Onychophora Pycnogonida Limulus Chilopoda Diplopoda Pauropoda Symphyla Argulus Ostracoda Triops Artemia Copepoda Leptostraca Stomatopoda Isopoda Euphausiacea Cephalocarida Remipedia Collembola Zygentoma Odonata Coleoptera Diptera Hymenoptera ;
CONSTRAINT Panarthropoda PARTIAL =  Tardigrada Onychophora Pycnogonida Limulus Scorpiones Pseudoscorpiones Opiliones Palpigradi Solifugae Ricinulei Thelyphonida Schizomida Amblypygi Araneae Acari Chilopoda Diplopoda Pauropoda Symphyla Argulus Ostracoda Triops Artemia Copepoda Leptostraca Stomatopoda Isopoda Euphausiacea Cephalocarida Remipedia Collembola Zygentoma Odonata Coleoptera Diptera Hymenoptera : Priapulida Nematoda ;

PRSET topologypr = CONSTRAINT (
Root,
Aparaglossata,
Neoptera,
Pterygota,
Insecta,
Hexapoda,
Multicrustacea,
Altocrustacea,
Pancrustacea,
Oligostraca,
Dignatha,
Progoneata,
Mandibulata,
Pedipalpi,
Arachnida,
Panarthropoda
);

MCMCP temp=0.1 samplefreq=1000 printfr=10000 nruns=4 nchain=4 relburnin=yes burninfrac=0.20;
MCMCP savebrlens=yes filename=Main011220;

SHOWMOVES;

MCMC ngen= 5000000;

SUMT filename=Main011220 contype=allcompat relburnin=yes burninfrac=0.20;
SUMP filename=Main011220 relburnin=yes burninfrac=0.20;

End;
